# Supplementary material
Source: HighWire-hosted journal article supplement (https://cmaj.ca/highwire/filestream/75313/field_highwire_adjunct_files/0/191283-res-1-at.pdf)
Supplement: 191283-res-1-at.pdf [file 191283-res-1-at.pdf]

## Appendix 1 (as submitted by the authors): Supplementary tables and figures

**Appendix 1A.** Regulatory warnings surrounding the risk of acute kidney injury following SGLT2 inhibitor use

**Appendix 1B.** Literature review of 7 published studies describing adverse renal events associated with SGLT2 inhibitor use compared with other classes of hypoglycemic medications or hypoglycemic medication non-use for the treatment of hyperglycemia.

**Appendix 1C.** REporting of studies Conducted using Observational Routinely-collected health Data (RECORD) statement

**Appendix 1D.** Data sources<sup>a</sup> and details about the information used in the study

**Appendix 1E.** Coding definitions for demographics, comorbid conditions, healthcare utilization measures and laboratory measurements

**Appendix 1F.** Standard daily drug doses of SGLT2 inhibitors and DPP4 inhibitors

**Appendix 1G.** 2012 KDIGO thresholds for AKI stages

**Appendix 1H.** ACE inhibitors, ARBs and all type of diuretic drugs included in the subgroup analysis

**Appendix 1I.** Variables included in the propensity score model

**Appendix 1J.** All baseline characteristics of older adults with type 2 diabetes newly dispensed SGLT2 inhibitors (canagliflozin, dapagliflozin or empagliflozin) and DPP4 inhibitors (saxagliptin, sitagliptin or linagliptin) in Ontario, Canada (2015-2017)

**Appendix 1K.** The proportion of patients who had at least one serum creatinine measurement during the follow-up period

**Appendix 1L.** Absolute changes in serum creatinine after SGLT2 inhibitor and DPP4 inhibitor use

**Appendix 1M.** Percent changes in serum creatinine after SGLT2 inhibitor and DPP4 inhibitor use

**Appendix 1N.** 90-day risk of a hospital encounter with acute kidney injury using diagnostic codes

**Appendix 1O.** 365-day risk of a hospital encounter with AKI among SGLT2 inhibitor users compared with DPP4 inhibitor users

**Appendix 1P.** 90-day risk of a hospital encounter with bowel obstruction

**Appendix 1Q.** Post-hoc E-value analysis to assess the extent of unmeasured confounding that would be required to negate the observed results

**Appendix 1R.** Observed distribution of propensity scores in SGLT2 inhibitor users and DPP4 inhibitor users

**Appendix 1S.** Weighted distribution<sup>a</sup> of propensity scores in SGLT2 inhibitor users and DPP4 inhibitor users

**Appendix 1A. Regulatory warnings surrounding the risk of acute kidney injury following SGLT2 inhibitor use (1,2)**

| Study Drug    | Summary of Warning                                                                                                                                                                                                                                                                                                                                                                                                                                                                                                                                                                                                                                                                                                                             |
|---------------|------------------------------------------------------------------------------------------------------------------------------------------------------------------------------------------------------------------------------------------------------------------------------------------------------------------------------------------------------------------------------------------------------------------------------------------------------------------------------------------------------------------------------------------------------------------------------------------------------------------------------------------------------------------------------------------------------------------------------------------------|
| Canagliflozin | <p>- In October 2015, Health Canada released a summary of the safety review which reported a risk of acute kidney injury following canagliflozin use. This review was based on reports of acute kidney injury both to Health Canada and international reports. In addition, scientific literature was reviewed at the time and it was noted that the drug’s renal effects might be a potential problem (2).</p> <p>- In June 2016, the United States Food and Drug Administration (FDA) strengthened kidney warnings for canagliflozin based on a search of the FDA adverse event reporting system identifying 101 patients with sufficient detail to confirm the diagnosis and show a temporal relationship with canagliflozin (1).</p>       |
| Empagliflozin | <p>- No warning about the risk of acute kidney injury following the use of empagliflozin.</p> <p>- However, in an FDA briefing document discussing the supplemental new drug application for empagliflozin using data from the EMPA-REG OUTCOME trial (released shortly after the warnings were issued for canagliflozin and dapagliflozin), there was a section stating that the risk of acute kidney injury with empagliflozin is slightly increased compared to placebo due to the diuretic activity of the drug leading to an early hemodynamic effect on renal function. In both the first 30 days and first 90 days following empagliflozin use, the incidence of early renal adverse events was greater in empagliflozin users (3).</p> |
| Dapagliflozin | <p>- In October 2015, Health Canada released a summary of the safety review which reported a risk of acute kidney injury following dapagliflozin use. This review was based on reports of acute kidney injury both to Health Canada and international reports. In addition, scientific literature was reviewed at the time it was noted that the drug’s renal effects might be a potential problem (2).</p> <p>- In June 2016, the United States Food and Drug Administration (FDA) strengthened kidney warnings for dapagliflozin based on a search of the FDA adverse event reporting system identifying 101 patients with sufficient detail to confirm the diagnosis and show a temporal relationship with dapagliflozin (1).</p>           |

**Appendix 1B. Literature review of 7 published studies describing adverse renal events associated with SGLT2 inhibitor use compared with other classes of hypoglycemic medications or hypoglycemic medication non-use for the treatment of hyperglycemia.**

| Author                              | Study Description                                                                                                                                                                                                                                                                                                                                    | Results                                                                                                                                                                                                                                                                                                                                                                                                                                                                                                                                                                                                                                                                                    | Study Limitations                                                                                                                                                                                                                                                 | Study Procedure/Exposure Time                                                                                                                                                                                                                                                                                                                                                                                                                  | Quality Score <sup>b</sup> |
|-------------------------------------|------------------------------------------------------------------------------------------------------------------------------------------------------------------------------------------------------------------------------------------------------------------------------------------------------------------------------------------------------|--------------------------------------------------------------------------------------------------------------------------------------------------------------------------------------------------------------------------------------------------------------------------------------------------------------------------------------------------------------------------------------------------------------------------------------------------------------------------------------------------------------------------------------------------------------------------------------------------------------------------------------------------------------------------------------------|-------------------------------------------------------------------------------------------------------------------------------------------------------------------------------------------------------------------------------------------------------------------|------------------------------------------------------------------------------------------------------------------------------------------------------------------------------------------------------------------------------------------------------------------------------------------------------------------------------------------------------------------------------------------------------------------------------------------------|----------------------------|
| <i>Randomized Controlled Trials</i> |                                                                                                                                                                                                                                                                                                                                                      |                                                                                                                                                                                                                                                                                                                                                                                                                                                                                                                                                                                                                                                                                            |                                                                                                                                                                                                                                                                   |                                                                                                                                                                                                                                                                                                                                                                                                                                                |                            |
| Zinman et al., 2015 (4)             | <ul style="list-style-type: none"> <li>- The EMPA-REG OUTCOME trial consisted of 7,020 patients at 590 sites in 42 countries</li> <li>- Adult patients <math>\geq</math> 18 years of age with type 2 diabetes and established cardiovascular disease were randomized to receive placebo, 10 mg of empagliflozin or 25 mg of empagliflozin</li> </ul> | <ul style="list-style-type: none"> <li>- 2,333 patients received placebo and 4,687 patients received empagliflozin (mean age 63 years in both groups)</li> <li>- Early worsening of eGFR by about 3 ml/min/1.73m<sup>2</sup> within the first 12 weeks, but sustained function over time (5)<sup>a</sup></li> <li>- The percentage of patients with AKI was lower in the empagliflozin groups compared to placebo</li> <li>- Doubling of the SCr occurred level less among empagliflozin users [HR 0.56 (95% CI 0.39 to 0.79)] (5)<sup>a</sup></li> <li>- The risk of renal-replacement therapy was lower with empagliflozin users [HR 0.45 (95% CI 0.21-0.97)] (5)<sup>a</sup></li> </ul> | <ul style="list-style-type: none"> <li>- Renal findings may not be generalizable to patients without established cardiovascular disease</li> <li>- Kidney endpoints were exploratory (AKI was not one of the primary outcomes of interest)</li> </ul>             | <ul style="list-style-type: none"> <li>- Patients underwent a 2 week, open-label, placebo run-in period</li> <li>- Patients either took empagliflozin or placebo once daily for a median duration of treatment of 2.6 years</li> <li>- Additional follow-up visit 30 days after the end of treatment</li> <li>- The median observation time was 3.1 years</li> </ul>                                                                           | 28                         |
| Neal et al., 2017 (6)               | <ul style="list-style-type: none"> <li>- The CANVAS program consisted of integrated data from two trials (CANVAS &amp; CANVAS-R) involving 10,142 participants from 667 centers in 30 countries</li> <li>- Adult patients <math>\geq</math> 30</li> </ul>                                                                                            | <ul style="list-style-type: none"> <li>- 4,347 patients received placebo and 5,795 patients received canagliflozin (mean age 63 years in both groups)</li> <li>- No higher risk of AKI following canagliflozin use versus placebo</li> <li>- The composite outcome of a sustained 40% reduction in the estimated glomerular filtration rate, the need for renal-replacement therapy, or death from renal causes occurred less frequently in patients receiving</li> </ul>                                                                                                                                                                                                                  | <ul style="list-style-type: none"> <li>- Moderate number of events for important outcomes</li> <li>- Kidney endpoints were exploratory in CANVAS (not the primary purpose of the trial)</li> <li>- AKI was not one of the primary outcomes of interest</li> </ul> | <ul style="list-style-type: none"> <li>- Patients underwent a 2-week, single-blind, placebo run-in period</li> <li>- The median follow-up was 126.1 weeks</li> <li>- 71.4% of CANVAS-R patients in the canagliflozin treatment group had the dose increased to 300mg</li> <li>- The urinary ACR was measured every 26 weeks in CANVAS-R and at week 12 and annually thereafter in CANVAS</li> <li>- SCr with eGFR measurements were</li> </ul> | 27                         |

|                                 |                                                                                                                                                                                                                                                                                                                            |                                                                                                                                                                                                                                                                                                                                                                                                                                                                                                            |                                                                                                                                                                               |                                                                                                                                                                                                                                                                                                                                       |           |
|---------------------------------|----------------------------------------------------------------------------------------------------------------------------------------------------------------------------------------------------------------------------------------------------------------------------------------------------------------------------|------------------------------------------------------------------------------------------------------------------------------------------------------------------------------------------------------------------------------------------------------------------------------------------------------------------------------------------------------------------------------------------------------------------------------------------------------------------------------------------------------------|-------------------------------------------------------------------------------------------------------------------------------------------------------------------------------|---------------------------------------------------------------------------------------------------------------------------------------------------------------------------------------------------------------------------------------------------------------------------------------------------------------------------------------|-----------|
|                                 | <p>years of age with type 2 diabetes and high cardiovascular risk were randomized to receive placebo, 100 mg canagliflozin or 300 mg of canagliflozin in CANVAS; placebo, 100 mg of canagliflozin with an option to increase to 300 mg of canagliflozin starting at week 13 in CANVAS-R</p>                                | <p>canagliflozin [HR 0.60 (95% CI 0.47 to 0.77)]</p>                                                                                                                                                                                                                                                                                                                                                                                                                                                       |                                                                                                                                                                               | <p>performed at least every 26 weeks in both trials</p>                                                                                                                                                                                                                                                                               |           |
| <p>Wiviott et al., 2018 (7)</p> | <p>- The DECLARE-TIMI 58 trial consisted of 17,160 participants at 882 sites in 33 countries<br/>- Adult patients <math>\geq 40</math> years of age with type 2 diabetes, and who had or were at risk for atherosclerotic cardiovascular disease were randomized to receive 10 mg of dapagliflozin or matching placebo</p> | <p>- 8, 578 patients received placebo and 8,582 patients received dapagliflozin (mean age 64 years in both groups)<br/>- AKI occurred less frequently in the dapagliflozin group compared with placebo [HR 0.69 (95% CI 0.55 to 0.87)]<br/>- The renal composite outcome of a sustained decrease of 40% or more in estimated glomerular filtration rate (eGFR), new ESRD, or death from renal or cardiovascular causes occurred less frequently in dapagliflozin users [HR 0.76 (95% CI 0.67 to 0.87)]</p> | <p>- Renal findings may not be generalizable to patients not at risk for atherosclerotic cardiovascular disease<br/>- AKI was not one of the primary outcomes of interest</p> | <p>- Patients underwent a 4-to-8-week, single-blind run-in period during which they received placebo, and blood and urine testing was performed<br/>- Patients returned for follow-up every 6 months<br/>- Patients were contacted by telephone every 3 months between in-person visits<br/>- Median follow-up time was 4.2 years</p> | <p>28</p> |

|                                 |                                                                                                                                                                                                                                                                                                                                                |                                                                                                                                                                                                                                                                                                                                                                                                                                                                                                                                                                                                                                                                                                           |                                                                                                                                                                                                                                                                                                                                                          |                                                                                                                                                                                                                                                                                                                                                                                                                                                                                                                                                                                                                                                     |    |
|---------------------------------|------------------------------------------------------------------------------------------------------------------------------------------------------------------------------------------------------------------------------------------------------------------------------------------------------------------------------------------------|-----------------------------------------------------------------------------------------------------------------------------------------------------------------------------------------------------------------------------------------------------------------------------------------------------------------------------------------------------------------------------------------------------------------------------------------------------------------------------------------------------------------------------------------------------------------------------------------------------------------------------------------------------------------------------------------------------------|----------------------------------------------------------------------------------------------------------------------------------------------------------------------------------------------------------------------------------------------------------------------------------------------------------------------------------------------------------|-----------------------------------------------------------------------------------------------------------------------------------------------------------------------------------------------------------------------------------------------------------------------------------------------------------------------------------------------------------------------------------------------------------------------------------------------------------------------------------------------------------------------------------------------------------------------------------------------------------------------------------------------------|----|
| Perkovic et al., 2019 (8)       | <ul style="list-style-type: none"> <li>- The CREDENCE trial consisted of 4,401 participants with type 2 diabetes and albuminuric chronic kidney disease</li> <li>- Adult patients <math>\geq 30</math> years of age were randomized to receive 100 mg of canagliflozin or matching placebo</li> </ul>                                          | <ul style="list-style-type: none"> <li>- 2,199 patients received placebo and 2,202 patients received canagliflozin (mean age 63 years in both groups)</li> <li>- Initial decline in eGFR within the first 3 months of initiation of canagliflozin</li> <li>- There was no difference in the risk of AKI between groups [HR 0.85 (95% CI 0.64 to 1.13)]</li> <li>- The primary composite outcome of ESRD (dialysis, transplantation, or a sustained eGFR of <math>&lt;15</math> ml per minute per <math>1.73</math> m<sup>2</sup>), a doubling of the SCr level, or death from renal or cardiovascular cause occurred less frequently among canagliflozin users [HR 0.70 (95% CI 0.59 to 0.82)]</li> </ul> | <ul style="list-style-type: none"> <li>- Findings about AKI may not be generalizable to those without established albuminuric chronic kidney disease</li> <li>- Trial was stopped early which might have limited the power for the AKI outcome</li> </ul>                                                                                                | <ul style="list-style-type: none"> <li>- Patients underwent a 2-week, single-blind, placebo run-in period</li> <li>- Patients were required to be receiving a stable dose of an ACE inhibitor or ARB for at least 4 weeks before randomization</li> <li>- Patients received 100mg once daily of canagliflozin or matching placebo with the use of randomly permuted blocks, with stratification according to the category of eGFR at screening</li> <li>- Follow-up occurred at weeks 3, 13, and 26 and then alternated between telephone calls and in-clinic visits at 13-week intervals</li> <li>- Median follow-up time of 2.62 years</li> </ul> | 25 |
| <i>Population-Based Studies</i> |                                                                                                                                                                                                                                                                                                                                                |                                                                                                                                                                                                                                                                                                                                                                                                                                                                                                                                                                                                                                                                                                           |                                                                                                                                                                                                                                                                                                                                                          |                                                                                                                                                                                                                                                                                                                                                                                                                                                                                                                                                                                                                                                     |    |
| Nadkarni et al., 2017 (9)       | <ul style="list-style-type: none"> <li>- Retrospective cohort study using data from the Mount Sinai chronic kidney disease registry, between January 2014 and December 2016, and the Geisinger Health System cohort, between January 2013 and February 2017, in the United States, to compare SGLT2 inhibitor users versus nonusers</li> </ul> | <ul style="list-style-type: none"> <li>- Mount Sinai cohort (mean age 63 years) - SGLT2 inhibitor users: n=372; nonusers: n=372</li> <li>- Geisinger cohort (mean age 58 years) - SGLT2 inhibitor users: n=1,207; nonusers: n=1,207</li> <li>- In the Mount Sinai cohort, the adjusted hazards of AKI<sub>KDIGO</sub> were 60% lower in SGLT2 inhibitor users compared to nonusers [adjusted HR 0.40 (95% CI 0.20 to 0.70)]</li> <li>- In the Geisinger cohort, the adjusted hazards of AKI<sub>KDIGO</sub> was not different between SGLT2 inhibitor users and nonusers [adjusted HR 0.60 (95% CI 0.40 to 1.10)]</li> </ul>                                                                              | <ul style="list-style-type: none"> <li>- In the Mount Sinai cohort, users and nonusers were not well matched on race, HbA1c levels, thiazide diuretics, and metformin use</li> <li>- Urine ACR measurements were missing in 85% of the Mount Sinai cohort</li> <li>- Residual confounding and confounding by indication may likely be present</li> </ul> | <ul style="list-style-type: none"> <li>- Only patients with type 2 diabetes and available SCr measurements were included</li> <li>- Exposure was a new prescription for canagliflozin, empagliflozin or dapagliflozin</li> <li>- Follow-up time was similar in SGLT2 inhibitor users and nonusers (458 vs. 439 days)</li> </ul>                                                                                                                                                                                                                                                                                                                     | 16 |

|                        |                                                                                                                                                                                                                                                                                               |                                                                                                                                                                                                                                                                                                    |                                                                                                                                                                                                                                                                                                                                                              |                                                                                                                                                                                                                                                                                                                                                                                                                                                                                                                               |    |
|------------------------|-----------------------------------------------------------------------------------------------------------------------------------------------------------------------------------------------------------------------------------------------------------------------------------------------|----------------------------------------------------------------------------------------------------------------------------------------------------------------------------------------------------------------------------------------------------------------------------------------------------|--------------------------------------------------------------------------------------------------------------------------------------------------------------------------------------------------------------------------------------------------------------------------------------------------------------------------------------------------------------|-------------------------------------------------------------------------------------------------------------------------------------------------------------------------------------------------------------------------------------------------------------------------------------------------------------------------------------------------------------------------------------------------------------------------------------------------------------------------------------------------------------------------------|----|
| Cahn et al., 2018 (10) | <ul style="list-style-type: none"> <li>- Retrospective cohort study using claims data from Israel to compare patients initiated on an SGLT2 inhibitor or DPP4 inhibitor between April 2015 to June 2017</li> </ul>                                                                            | <ul style="list-style-type: none"> <li>- SGLT2 inhibitor users: n=6,418; (mean age 62 years) DPP4 inhibitor users: n=5,604 (mean age 64 years)</li> <li>- The risk of AKI [OR 0.47 (95% CI 0.27 to 0.80)] was lower in patients initiating an SGLT2 inhibitor versus a DPP4 inhibitor</li> </ul>   | <ul style="list-style-type: none"> <li>- May be selection bias in patients who initiated an SGLT2 inhibitor or DPP4 inhibitor</li> <li>- Since canagliflozin is not available in Israel, only patients who initiated empagliflozin or dapagliflozin were included</li> <li>- Residual confounding may be present</li> </ul>                                  | <ul style="list-style-type: none"> <li>- Only dapagliflozin and empagliflozin are available in Israel</li> <li>- The index date was defined as the first date of purchase of SGLT2 inhibitor or DPP4 inhibitor</li> <li>- At least two consecutive prescriptions within 120 days on the index date was required for study inclusion</li> <li>- The first SCr measurement within 2 to 24 weeks after index was defined as the follow-up measurement</li> <li>- Follow-up time was 24 weeks following the index date</li> </ul> | 16 |
| Ueda et al., 2018 (11) | <ul style="list-style-type: none"> <li>- Retrospective cohort study using data from nationwide health and administrative registers in Sweden and Denmark to compare patients that newly initiated an SGLT2 inhibitor or a GLP1 receptor agonist between July 2013 to December 2016</li> </ul> | <ul style="list-style-type: none"> <li>- SGLT2 inhibitor users: n=17,213; GLP1 receptor agonists: n=17,213 (mean age 61 years after matching)</li> <li>- No increase in the risk of AKI [HR 0.69 (95%CI 0.45 to 1.05)] in SGLT2 inhibitor users compared to GLP1 receptor agonist users</li> </ul> | <ul style="list-style-type: none"> <li>- The use of canagliflozin was rare among SGLT2 inhibitor users</li> <li>- Medication compliance might bias the results of this study towards the null</li> <li>- The codes for AKI have not been validated which may have led to outcome misclassification</li> <li>- Residual confounding may be present</li> </ul> | <ul style="list-style-type: none"> <li>- The date of filling the first new prescription was considered the index date</li> <li>- Patients were classified as exposed if prescriptions were refilled before the estimated end date of the most recent prescription</li> <li>- Median follow-up time ranged between 270 and 274 days</li> </ul>                                                                                                                                                                                 | 18 |

Abbreviations: ACE= angiotensin-converting-enzyme, ACR= albumin-to-creatinine ratio, AKI= acute kidney injury, ARB= angiotensin-receptor blocker, CI= confidence interval, DPP4= dipeptidyl peptidase-4, eGFR = estimated glomerular filtration rate, ESRD= end-stage renal disease, GLP1= glucagon-like peptide-1, HbA1c= glycated hemoglobin, HR= hazard ratio, KDIGO= kidney disease improving global outcomes, OR= odds ratio, SCr= serum creatinine, SGLT2= sodium-glucose cotransporter-2

<sup>a</sup>Wanner et al. presented the results of a prespecified secondary objective of the EMPAREG-OUTCOME trial, which was to examine the effects of empagliflozin on microvascular outcomes.

<sup>b</sup>We evaluated the quality of studies using the Modified Downs and Black checklist for the assessment of the methodological quality of both randomized and non-randomized studies. We gave all studies a score from 0 to 27, grouped into the following four quality levels: excellent (26 to 28), good (20-25), fair (15-19) and poor (14 or less).

**Appendix 1C. Reporting of studies Conducted using Observational Routinely-collected health Data (RECORD) statement for Pharmacoepidemiology (RECORD-PE) (12)**

| Item No                   | STROBE items                                                                                                                                                                                    | RECORD items                                                                                                                                                                                                                                                                                                                                                                                                  | RECORD-PE items | Section          |
|---------------------------|-------------------------------------------------------------------------------------------------------------------------------------------------------------------------------------------------|---------------------------------------------------------------------------------------------------------------------------------------------------------------------------------------------------------------------------------------------------------------------------------------------------------------------------------------------------------------------------------------------------------------|-----------------|------------------|
| <b>Title and abstract</b> |                                                                                                                                                                                                 |                                                                                                                                                                                                                                                                                                                                                                                                               |                 |                  |
| 1                         | (a) Indicate the study's design with a commonly used term in the title or the abstract.<br>(b) Provide in the abstract an informative and balanced summary of what was done and what was found. | 1.1: The type of data used should be specified in the title or abstract. When possible, the name of the databases used should be included.<br>1.2: If applicable, the geographical region and timeframe within which the study took place should be reported in the title or abstract. 1.3: If linkage between databases was conducted for the study, this should be clearly stated in the title or abstract. | —               | Title & Abstract |
| <b>Introduction</b>       |                                                                                                                                                                                                 |                                                                                                                                                                                                                                                                                                                                                                                                               |                 |                  |
| Background rationale      |                                                                                                                                                                                                 |                                                                                                                                                                                                                                                                                                                                                                                                               |                 |                  |
| 2                         | Explain the scientific background and rationale for the investigation being reported.                                                                                                           | —                                                                                                                                                                                                                                                                                                                                                                                                             | —               | Introduction     |
| Objectives                |                                                                                                                                                                                                 |                                                                                                                                                                                                                                                                                                                                                                                                               |                 |                  |
| 3                         | State specific objectives, including any prespecified hypotheses.                                                                                                                               | —                                                                                                                                                                                                                                                                                                                                                                                                             | —               | Introduction     |
| <b>Methods</b>            |                                                                                                                                                                                                 |                                                                                                                                                                                                                                                                                                                                                                                                               |                 |                  |
| Study design              |                                                                                                                                                                                                 |                                                                                                                                                                                                                                                                                                                                                                                                               |                 |                  |

|              |                                                                                                                                                                                                                                                                                                                                                                                                                                                                                                                                                                                                                                                      |                                                                                                                                                                                                                                                                                                                                                                                                                                                                                                                                                                                                                                      |                                                                                                                                                                                                                                                                                                                                                                                 |                                             |
|--------------|------------------------------------------------------------------------------------------------------------------------------------------------------------------------------------------------------------------------------------------------------------------------------------------------------------------------------------------------------------------------------------------------------------------------------------------------------------------------------------------------------------------------------------------------------------------------------------------------------------------------------------------------------|--------------------------------------------------------------------------------------------------------------------------------------------------------------------------------------------------------------------------------------------------------------------------------------------------------------------------------------------------------------------------------------------------------------------------------------------------------------------------------------------------------------------------------------------------------------------------------------------------------------------------------------|---------------------------------------------------------------------------------------------------------------------------------------------------------------------------------------------------------------------------------------------------------------------------------------------------------------------------------------------------------------------------------|---------------------------------------------|
| 4            | Present key elements of study design early in the paper.                                                                                                                                                                                                                                                                                                                                                                                                                                                                                                                                                                                             | —                                                                                                                                                                                                                                                                                                                                                                                                                                                                                                                                                                                                                                    | 4.a: Include details of the specific study design (and its features) and report the use of multiple designs if used.<br>4.b: The use of a diagram(s) is recommended to illustrate key aspects of the study design(s), including exposure, washout, lag and observation periods, and covariate definitions as relevant.                                                          | Methods:<br>Study Design & Research Setting |
| Setting      |                                                                                                                                                                                                                                                                                                                                                                                                                                                                                                                                                                                                                                                      |                                                                                                                                                                                                                                                                                                                                                                                                                                                                                                                                                                                                                                      |                                                                                                                                                                                                                                                                                                                                                                                 |                                             |
| 5            | Describe the setting, locations, and relevant dates, including periods of recruitment, exposure, follow-up, and data collection.                                                                                                                                                                                                                                                                                                                                                                                                                                                                                                                     | —                                                                                                                                                                                                                                                                                                                                                                                                                                                                                                                                                                                                                                    | —                                                                                                                                                                                                                                                                                                                                                                               | Methods: Study Design & Research Setting    |
| Participants |                                                                                                                                                                                                                                                                                                                                                                                                                                                                                                                                                                                                                                                      |                                                                                                                                                                                                                                                                                                                                                                                                                                                                                                                                                                                                                                      |                                                                                                                                                                                                                                                                                                                                                                                 |                                             |
| 6            | (a) Cohort study—give the eligibility criteria, and the sources and methods of selection of participants. Describe methods of follow-up. Case-control study—give the eligibility criteria, and the sources and methods of case ascertainment and control selection. Give the rationale for the choice of cases and controls. Cross sectional study—give the eligibility criteria, and the sources and methods of selection of participants.<br>(b) Cohort study—for matched studies, give matching criteria and number of exposed and unexposed. Case-control study—for matched studies, give matching criteria and the number of controls per case. | 6.1: The methods of study population selection (such as codes or algorithms used to identify participants) should be listed in detail. If this is not possible, an explanation should be provided.<br>6.2: Any validation studies of the codes or algorithms used to select the population should be referenced. If validation was conducted for this study and not published elsewhere, detailed methods and results should be provided.<br>6.3: If the study involved linkage of databases, consider use of a flow diagram or other graphical display to demonstrate the data linkage process, including the number of individuals | 6.1.a: Describe the study entry criteria and the order in which these criteria were applied to identify the study population. Specify whether only users with a specific indication were included and whether patients were allowed to enter the study population once or if multiple entries were permitted. See explanatory document for guidance related to matched designs. | Methods: Data Sources; Cohort Assembly      |



|                          |                                                                                                                                                                                       |                                                                                                                                                                                                          |                                                                                                                                                                                                                                                                                                                                                                                                                                                                                                                                                                                                                                                                                                                                                                                                                                                                           |                                                                                                           |
|--------------------------|---------------------------------------------------------------------------------------------------------------------------------------------------------------------------------------|----------------------------------------------------------------------------------------------------------------------------------------------------------------------------------------------------------|---------------------------------------------------------------------------------------------------------------------------------------------------------------------------------------------------------------------------------------------------------------------------------------------------------------------------------------------------------------------------------------------------------------------------------------------------------------------------------------------------------------------------------------------------------------------------------------------------------------------------------------------------------------------------------------------------------------------------------------------------------------------------------------------------------------------------------------------------------------------------|-----------------------------------------------------------------------------------------------------------|
|                          |                                                                                                                                                                                       | with linked data at each stage.                                                                                                                                                                          |                                                                                                                                                                                                                                                                                                                                                                                                                                                                                                                                                                                                                                                                                                                                                                                                                                                                           |                                                                                                           |
| Variables                |                                                                                                                                                                                       |                                                                                                                                                                                                          |                                                                                                                                                                                                                                                                                                                                                                                                                                                                                                                                                                                                                                                                                                                                                                                                                                                                           |                                                                                                           |
| 7                        | Clearly define all outcomes, exposures, predictors, potential confounders, and effect modifiers. Give diagnostic criteria, if applicable.                                             | 7.1: A complete list of codes and algorithms used to classify exposures, outcomes, confounders, and effect modifiers should be provided. If these cannot be reported, an explanation should be provided. | 7.1.a: Describe how the drug exposure definition was developed.<br>7.1.b: Specify the data sources from which drug exposure information for individuals was obtained.<br>7.1.c: Describe the time window(s) during which an individual is considered exposed to the drug(s). The rationale for selecting a particular time window should be provided. The extent of potential left truncation or left censoring should be specified.<br>7.1.d: Justify how events are attributed to current, prior, ever, or cumulative drug exposure.<br>7.1.e: When examining drug dose and risk attribution, describe how current, historical or time on therapy are considered.<br>7.1.f: Use of any comparator groups should be outlined and justified.<br>7.1.g: Outline the approach used to handle individuals with more than one relevant drug exposure during the study period. | Methods:<br>Cohort<br>Assembly;<br>Outcomes<br>•Codes for baseline characteristics available upon request |
| Data sources/measurement |                                                                                                                                                                                       |                                                                                                                                                                                                          |                                                                                                                                                                                                                                                                                                                                                                                                                                                                                                                                                                                                                                                                                                                                                                                                                                                                           |                                                                                                           |
| 8                        | For each variable of interest, give sources of data and details of methods of assessment (measurement). Describe comparability of assessment methods if there is more than one group. |                                                                                                                                                                                                          | 8.a: Describe the healthcare system and mechanisms for generating the drug exposure records. Specify the care setting in which the drug(s) of interest was prescribed.                                                                                                                                                                                                                                                                                                                                                                                                                                                                                                                                                                                                                                                                                                    | Methods: Data Sources                                                                                     |
| Bias                     |                                                                                                                                                                                       |                                                                                                                                                                                                          |                                                                                                                                                                                                                                                                                                                                                                                                                                                                                                                                                                                                                                                                                                                                                                                                                                                                           |                                                                                                           |
| 9                        | Describe any efforts to address potential sources of bias.                                                                                                                            | —                                                                                                                                                                                                        | —                                                                                                                                                                                                                                                                                                                                                                                                                                                                                                                                                                                                                                                                                                                                                                                                                                                                         | Methods:<br>Additional Outcomes                                                                           |

|                                  |                                                                                                                                                                                                                                                                                                                                                                                                                                                                                                                                            |                                                                                                                                                                                                                                            |                                                                                                                                                                                              |                                                                                  |
|----------------------------------|--------------------------------------------------------------------------------------------------------------------------------------------------------------------------------------------------------------------------------------------------------------------------------------------------------------------------------------------------------------------------------------------------------------------------------------------------------------------------------------------------------------------------------------------|--------------------------------------------------------------------------------------------------------------------------------------------------------------------------------------------------------------------------------------------|----------------------------------------------------------------------------------------------------------------------------------------------------------------------------------------------|----------------------------------------------------------------------------------|
|                                  |                                                                                                                                                                                                                                                                                                                                                                                                                                                                                                                                            |                                                                                                                                                                                                                                            |                                                                                                                                                                                              | Interpretation:<br>Study Strengths                                               |
| Study size                       |                                                                                                                                                                                                                                                                                                                                                                                                                                                                                                                                            |                                                                                                                                                                                                                                            |                                                                                                                                                                                              |                                                                                  |
| 10                               | Explain how the study size was arrived at.                                                                                                                                                                                                                                                                                                                                                                                                                                                                                                 | —                                                                                                                                                                                                                                          | —                                                                                                                                                                                            | Figure 1                                                                         |
| Quantitative variables           |                                                                                                                                                                                                                                                                                                                                                                                                                                                                                                                                            |                                                                                                                                                                                                                                            |                                                                                                                                                                                              |                                                                                  |
| 11                               | Explain how quantitative variables were handled in the analyses. If applicable, describe which groupings were chosen, and why.                                                                                                                                                                                                                                                                                                                                                                                                             | —                                                                                                                                                                                                                                          | —                                                                                                                                                                                            | Methods:<br>Statistical Analyses                                                 |
| Statistical methods              |                                                                                                                                                                                                                                                                                                                                                                                                                                                                                                                                            |                                                                                                                                                                                                                                            |                                                                                                                                                                                              |                                                                                  |
|                                  | (a) Describe all statistical methods, including those used to control for confounding.<br>(b) Describe any methods used to examine subgroups and interactions.<br>(c) Explain how missing data were addressed.<br>(d) Cohort study—if applicable, explain how loss to follow-up was addressed. Case-control study—if applicable, explain how matching of cases and controls was addressed. Cross sectional study—if applicable, describe analytical methods taking account of sampling strategy.<br>(e) Describe any sensitivity analyses. | —                                                                                                                                                                                                                                          | 12.1.a: Describe the methods used to evaluate whether the assumptions have been met.<br>12.1.b: Describe and justify the use of multiple designs, design features, or analytical approaches. | Methods:<br>Additional Outcomes;<br>Statistical Analyses<br>Footnotes of Table 1 |
| Data access and cleaning methods |                                                                                                                                                                                                                                                                                                                                                                                                                                                                                                                                            |                                                                                                                                                                                                                                            |                                                                                                                                                                                              |                                                                                  |
| 12                               | —                                                                                                                                                                                                                                                                                                                                                                                                                                                                                                                                          | 12.1: Authors should describe the extent to which the investigators had access to the database population used to create the study population.<br>12.2: Authors should provide information on the data cleaning methods used in the study. | —                                                                                                                                                                                            | N/A                                                                              |
| Linkage                          |                                                                                                                                                                                                                                                                                                                                                                                                                                                                                                                                            |                                                                                                                                                                                                                                            |                                                                                                                                                                                              |                                                                                  |
| 12                               | —                                                                                                                                                                                                                                                                                                                                                                                                                                                                                                                                          | 12.3: State whether the study included person                                                                                                                                                                                              | —                                                                                                                                                                                            | Methods: Data Sources                                                            |

|                  |                                                                                                                                                                                                                                                                                                                     |                                                                                                                                                                                                                                                                                                            |   |                     |
|------------------|---------------------------------------------------------------------------------------------------------------------------------------------------------------------------------------------------------------------------------------------------------------------------------------------------------------------|------------------------------------------------------------------------------------------------------------------------------------------------------------------------------------------------------------------------------------------------------------------------------------------------------------|---|---------------------|
|                  |                                                                                                                                                                                                                                                                                                                     | level, institutional level, or other data linkage across two or more databases. The methods of linkage and methods of linkage quality evaluation should be provided.                                                                                                                                       |   |                     |
| <b>Results</b>   |                                                                                                                                                                                                                                                                                                                     |                                                                                                                                                                                                                                                                                                            |   |                     |
| Participants     |                                                                                                                                                                                                                                                                                                                     |                                                                                                                                                                                                                                                                                                            |   |                     |
| 13               | (a) Report the numbers of individuals at each stage of the study (eg, numbers potentially eligible, examined for eligibility, confirmed eligible, included in the study, completing follow-up, and analysed).<br>(b) Give reasons for non-participation at each stage.<br>(c) Consider use of a flow diagram.       | 13.1: Describe in detail the selection of the individuals included in the study (that is, study population selection) including filtering based on data quality, data availability, and linkage. The selection of included individuals can be described in the text or by means of the study flow diagram. | — | Figure 1            |
| Descriptive data |                                                                                                                                                                                                                                                                                                                     |                                                                                                                                                                                                                                                                                                            |   |                     |
| 14               | (a) Give characteristics of study participants (eg, demographic, clinical, social) and information on exposures and potential confounders.<br>(b) Indicate the number of participants with missing data for each variable of interest.<br>(c) Cohort study—summarise follow-up time (eg, average and total amount). | —                                                                                                                                                                                                                                                                                                          | — | Table 1, Appendix 8 |
| Outcome data     |                                                                                                                                                                                                                                                                                                                     |                                                                                                                                                                                                                                                                                                            |   |                     |
| 15               | Cohort study—report numbers of outcome events or summary measures over time.<br>Case-control study—report numbers in each exposure category, or summary measures of exposure. Cross sectional study—report numbers of outcome events or summary measures.                                                           | —                                                                                                                                                                                                                                                                                                          | — | Table 2             |
| Main results     |                                                                                                                                                                                                                                                                                                                     |                                                                                                                                                                                                                                                                                                            |   |                     |

|                   |                                                                                                                                                                                                                                                                                                                                                                                                                  |                                                                                                                                                                                                                                                                                                   |                                                                                                                                                                                                                    |                                   |
|-------------------|------------------------------------------------------------------------------------------------------------------------------------------------------------------------------------------------------------------------------------------------------------------------------------------------------------------------------------------------------------------------------------------------------------------|---------------------------------------------------------------------------------------------------------------------------------------------------------------------------------------------------------------------------------------------------------------------------------------------------|--------------------------------------------------------------------------------------------------------------------------------------------------------------------------------------------------------------------|-----------------------------------|
| 16                | (a) Give unadjusted estimates and, if applicable, confounder adjusted estimates and their precision (eg, 95% confidence intervals). Make clear which confounders were adjusted for and why they were included.<br>(b) Report category boundaries when continuous variables are categorised.<br>(c) If relevant, consider translating estimates of relative risk into absolute risk for a meaningful time period. | —                                                                                                                                                                                                                                                                                                 | —                                                                                                                                                                                                                  | Table 2                           |
| Other analyses    |                                                                                                                                                                                                                                                                                                                                                                                                                  |                                                                                                                                                                                                                                                                                                   |                                                                                                                                                                                                                    |                                   |
| 17                | Report other analyses done—eg, analyses of subgroups and interactions, and sensitivity analyses.                                                                                                                                                                                                                                                                                                                 | —                                                                                                                                                                                                                                                                                                 | —                                                                                                                                                                                                                  | Figure 2; Appendix 11             |
| <b>Discussion</b> |                                                                                                                                                                                                                                                                                                                                                                                                                  |                                                                                                                                                                                                                                                                                                   |                                                                                                                                                                                                                    |                                   |
| Key results       |                                                                                                                                                                                                                                                                                                                                                                                                                  |                                                                                                                                                                                                                                                                                                   |                                                                                                                                                                                                                    |                                   |
| 18                | Summarise key results with reference to study objectives.                                                                                                                                                                                                                                                                                                                                                        | —                                                                                                                                                                                                                                                                                                 | —                                                                                                                                                                                                                  | Interpretation                    |
| Limitations       |                                                                                                                                                                                                                                                                                                                                                                                                                  |                                                                                                                                                                                                                                                                                                   |                                                                                                                                                                                                                    |                                   |
| 19                | Discuss limitations of the study, taking into account sources of potential bias or imprecision. Discuss both direction and magnitude of any potential bias.                                                                                                                                                                                                                                                      | 19.1: Discuss the implications of using data that were not created or collected to answer the specific research question(s). Include discussion of misclassification bias, unmeasured confounding, missing data, and changing eligibility over time, as they pertain to the study being reported. | 19.1.a: Describe the degree to which the chosen database(s) adequately captures the drug exposure(s) of interest.                                                                                                  | Interpretation: Study Limitations |
| Interpretation    |                                                                                                                                                                                                                                                                                                                                                                                                                  |                                                                                                                                                                                                                                                                                                   |                                                                                                                                                                                                                    |                                   |
| 20                | Give a cautious overall interpretation of results considering objectives, limitations, multiplicity of analyses, results from similar studies, and other relevant evidence.                                                                                                                                                                                                                                      | —                                                                                                                                                                                                                                                                                                 | 20.a: Discuss the potential for confounding by indication, contraindication or disease severity or selection bias (healthy adherer/sick stopper) as alternative explanations for the study findings when relevant. | Interpretation: Conclusion        |

|                                                                  |                                                                                                                                                                |                                                                                                                                                   |   |                |
|------------------------------------------------------------------|----------------------------------------------------------------------------------------------------------------------------------------------------------------|---------------------------------------------------------------------------------------------------------------------------------------------------|---|----------------|
| <b>Generalisability</b>                                          |                                                                                                                                                                |                                                                                                                                                   |   |                |
| 21                                                               | Discuss the generalisability (external validity) of the study results.                                                                                         | —                                                                                                                                                 | — | Interpretation |
| <b>Other information</b>                                         |                                                                                                                                                                |                                                                                                                                                   |   |                |
| <b>Funding</b>                                                   |                                                                                                                                                                |                                                                                                                                                   |   |                |
| 22                                                               | Give the source of funding and the role of the funders for the present study and, if applicable, for the original study on which the present article is based. | —                                                                                                                                                 | — | Funding        |
| <b>Accessibility of protocol, raw data, and programming code</b> |                                                                                                                                                                |                                                                                                                                                   |   |                |
| 22                                                               | —                                                                                                                                                              | 22.1: Authors should provide information on how to access any supplemental information such as the study protocol, raw data, or programming code. | — | N/A            |

**Appendix 1D. Data sources<sup>a</sup> and details about the information used in the study**

|                                                                                                                                     |                                                                                                                                                                                                                                                                   |
|-------------------------------------------------------------------------------------------------------------------------------------|-------------------------------------------------------------------------------------------------------------------------------------------------------------------------------------------------------------------------------------------------------------------|
| Ontario Drug Benefit (ODB) database                                                                                                 | - Identified prescription claims for individuals aged 65 years or older. This database contains accurate records of all dispensed outpatient prescriptions (13).                                                                                                  |
| Ontario Laboratory Information System (OLIS)                                                                                        | - Studied laboratory values from hospital and community laboratories, to assess changes in serum creatinine to diagnose AKI and estimated glomerular filtration rate (eGFRs) using the Chronic Kidney Disease Epidemiology Collaboration (CKD-EPI) equation (14). |
| Canadian Institute for Health Information's Discharge Abstract Database (DAD) and National Ambulatory Care Reporting System (NACRS) | - Ascertained information on hospitalizations and emergency department visits, respectively                                                                                                                                                                       |
| Ontario Health Insurance Plan (OHIP) Database                                                                                       | - Ascertained information on physician billings                                                                                                                                                                                                                   |
| ICES Physician Database (IPDB)                                                                                                      | - Ascertained information on prescribing physicians                                                                                                                                                                                                               |
| Registered Persons Database (RPDB)                                                                                                  | - Ascertained information on demographic characteristics and vital status                                                                                                                                                                                         |

<sup>a</sup>We used the 10th edition of the International Classification of Diseases diagnosis codes to define comorbidities.

**Appendix 1E. Coding definitions for demographics, comorbid conditions, healthcare utilization measures and laboratory measurements**

| Variable                                              | Database                       | Codes                                                                                                                                                                                                                                                                                                                                                                                                                                                                                                                                                                                                                                                                                                                                                                                           |
|-------------------------------------------------------|--------------------------------|-------------------------------------------------------------------------------------------------------------------------------------------------------------------------------------------------------------------------------------------------------------------------------------------------------------------------------------------------------------------------------------------------------------------------------------------------------------------------------------------------------------------------------------------------------------------------------------------------------------------------------------------------------------------------------------------------------------------------------------------------------------------------------------------------|
| <b>Demographics</b>                                   |                                |                                                                                                                                                                                                                                                                                                                                                                                                                                                                                                                                                                                                                                                                                                                                                                                                 |
| Age                                                   | RPDB                           |                                                                                                                                                                                                                                                                                                                                                                                                                                                                                                                                                                                                                                                                                                                                                                                                 |
| Sex                                                   | RPDB                           |                                                                                                                                                                                                                                                                                                                                                                                                                                                                                                                                                                                                                                                                                                                                                                                                 |
| Location of residence – Rural status                  | RPDB                           | RURAL                                                                                                                                                                                                                                                                                                                                                                                                                                                                                                                                                                                                                                                                                                                                                                                           |
| Socioeconomic status (neighbourhood income quintiles) | RPDB                           | INCQUINT                                                                                                                                                                                                                                                                                                                                                                                                                                                                                                                                                                                                                                                                                                                                                                                        |
| Local Health Integration Network (LHIN)               | RPDB                           | LHIN                                                                                                                                                                                                                                                                                                                                                                                                                                                                                                                                                                                                                                                                                                                                                                                            |
| Entry year                                            |                                |                                                                                                                                                                                                                                                                                                                                                                                                                                                                                                                                                                                                                                                                                                                                                                                                 |
| Prescribing physician                                 | IPDB                           | MAINSPECIALTY                                                                                                                                                                                                                                                                                                                                                                                                                                                                                                                                                                                                                                                                                                                                                                                   |
| <b>Comorbidities</b>                                  |                                |                                                                                                                                                                                                                                                                                                                                                                                                                                                                                                                                                                                                                                                                                                                                                                                                 |
| Duration of diabetes                                  | ODD                            |                                                                                                                                                                                                                                                                                                                                                                                                                                                                                                                                                                                                                                                                                                                                                                                                 |
| Acute kidney injury                                   | CIHI-DAD                       | ICD-10: N17                                                                                                                                                                                                                                                                                                                                                                                                                                                                                                                                                                                                                                                                                                                                                                                     |
| Chronic kidney disease                                | CIHI-DAD<br>OHIP               | ICD-10: E102, E112, E132, E142, I12, I13, N00, N01, N02, N03, N04, N05, N06, N07, N08, N10, N11, N12, N13, N14, N15, N16, N17, N18, N19, N20, N21, N22, N23<br>OHIP dx: 403, 585                                                                                                                                                                                                                                                                                                                                                                                                                                                                                                                                                                                                                |
| Acute urinary retention                               | CIHI-DAD                       | ICD-10: R33                                                                                                                                                                                                                                                                                                                                                                                                                                                                                                                                                                                                                                                                                                                                                                                     |
| Chronic obstructive pulmonary disease                 | CIHI-DAD                       | ICD-10: J41, J43, J44                                                                                                                                                                                                                                                                                                                                                                                                                                                                                                                                                                                                                                                                                                                                                                           |
| Chronic lung disease                                  | CIHI-DAD<br>CIHI-NACRS<br>OHIP | ICD-10: I272, I278, I279, J40, J41, J42, J43, J44, J45, J47, J60, J61, J62, J63, J64, J65, J66, J67, J68, J701, J703, J704, J708, J709, J82, J84, J92, J941, J949, J953, J961, J969, J984, J988, J989, J99<br>OHIP dx: 491, 492, 493, 494, 496, 501, 502, 515, 518, 519<br>OHIP fee: J889, J689                                                                                                                                                                                                                                                                                                                                                                                                                                                                                                 |
| Cancer                                                | CIHI-DAD<br>OHIP               | ICD-10: 80003, 80006, 80013, 80023, 80033, 80043, 80102, 80103, 80106, 80113, 80123, 802, 803, 80413, 80423, 80433, 80443, 80453, 80502, 80503, 80513, 80523, 807, 808, 80903, 80913, 80923, 80933, 80943, 80953, 81103, 81202, 81203, 81213, 81223, 81233, 81243, 81303, 81402, 81403, 81406, 81413, 81423, 81433, 81443, 81453, 81473, 81503, 81513, 81523, 81533, 81543, 81553, 81603, 81613, 81623, 81703, 81713, 81803, 81903, 82003, 82013, 82102, 82103, 82113, 82203, 82213, 823, 82403, 82413, 82433, 82443, 82453, 82463, 82473, 82503, 82513, 82603, 82612, 82613, 82623, 82632, 82633, 82703, 82803, 82813, 82903, 83003, 83103, 83123, 83143, 83153, 83203, 83223, 83233, 83303, 83313, 83323, 83403, 83503, 83703, 83803, 83813, 83903, 84003, 84013, 84103, 84203, 84303, 84403, |

|        |          |                                                                                                                                                                                                                                                                                                                                                                                                                                                                                                                                                                                                                                                                                                                                                                                                                                                                                                                                                                                                                                                                                                                                                                                                                                                                                                                                                                                                                                                                                                                                                                                                                                                                                                                                                                                                                                                                                                                                                                                                                                                                                                                                                                                                                                                                                                                                                                                                                                                |
|--------|----------|------------------------------------------------------------------------------------------------------------------------------------------------------------------------------------------------------------------------------------------------------------------------------------------------------------------------------------------------------------------------------------------------------------------------------------------------------------------------------------------------------------------------------------------------------------------------------------------------------------------------------------------------------------------------------------------------------------------------------------------------------------------------------------------------------------------------------------------------------------------------------------------------------------------------------------------------------------------------------------------------------------------------------------------------------------------------------------------------------------------------------------------------------------------------------------------------------------------------------------------------------------------------------------------------------------------------------------------------------------------------------------------------------------------------------------------------------------------------------------------------------------------------------------------------------------------------------------------------------------------------------------------------------------------------------------------------------------------------------------------------------------------------------------------------------------------------------------------------------------------------------------------------------------------------------------------------------------------------------------------------------------------------------------------------------------------------------------------------------------------------------------------------------------------------------------------------------------------------------------------------------------------------------------------------------------------------------------------------------------------------------------------------------------------------------------------------|
|        |          | <p>84413, 84423, 84503, 84513, 84603, 84613, 84623, 84703, 84713, 84723, 84733, 84803, 84806, 84813, 849, 85002, 85003, 85012, 85013, 85023, 85032, 85033, 85042, 85043, 851, 852, 85303, 854, 85503, 85603, 85623, 857, 85803, 86003, 86203, 86303, 86403, 86503, 86803, 86933, 87003, 87103, 87202, 87203, 87213, 87223, 87233, 87303, 87403, 87412, 87413, 87422, 87423, 87433, 87443, 87453, 87613, 87703, 87713, 87723, 87733, 87743, 87803, 88003, 88006, 88013, 88023, 88033, 88043, 88103, 88113, 88123, 88133, 88143, 88303, 88323, 88333, 88403, 88503, 88513, 88523, 88533, 88543, 88553, 88583, 88903, 88913, 88943, 88953, 88963, 89003, 89013, 89023, 89103, 89203, 89303, 89333, 89403, 89413, 895, 89603, 89633, 89643, 897, 89803, 89813, 89903, 89913, 90003, 90203, 90403, 90413, 90423, 90433, 90443, 90503, 90513, 90523, 90533, 906, 90703, 90713, 90723, 90803, 90813, 90823, 90833, 90843, 90853, 90903, 91003, 91013, 91023, 91103, 91203, 91243, 91303, 91333, 91403, 91503, 91703, 91803, 91813, 91823, 91833, 91843, 91853, 91903, 92203, 92213, 92303, 92313, 92403, 92503, 92513, 92603, 92613, 92703, 92903, 93103, 93303, 93623, 93643, 93703, 93803, 93813, 93823, 93903, 93913, 93923, 940, 941, 942, 94303, 944, 945, 94603, 947, 948, 94903, 95003, 95013, 95023, 95033, 95043, 951, 952, 95303, 95393, 95403, 95603, 95613, 95803, 95813, 959, 965, 966, 967, 968, 969, 970, 971, 972, 973, 97403, 97413, 97603, 97613, 97623, 97633, 97643, 980, 982, 98303, 984, 98503, 986, 98703, 98803, 989, 99003, 99103, 993, 994, C00, C01, C02, C03, C04, C05, C06, C07, C08, C09, C10, C11, C12, C13, C14, C15, C16, C17, C18, C19, C20, C21, C22, C23, C24, C25, C26, C30, C31, C32, C33, C34, C37, C38, C39, C40, C41, C43, C44, C45, C46, C47, C48, C49, C50, C51, C52, C53, C54, C55, C56, C57, C58, C60, C61, C62, C63, C64, C65, C66, C67, C68, C69, C70, C71, C72, C73, C74, C75, C76, C77, C78, C79, C80, C81, C82, C83, C84, C85, C86, C88, C90, C91, C92, C93, C94, C95, C96, C97, D00, D01, D02, D03, D04, D05, D06, D07, D09, Z85</p> <p>OHIP dx: 140, 141, 142, 143, 144, 145, 146, 147, 148, 149, 150, 151, 152, 153, 154, 155, 156, 157, 158, 159, 160, 161, 162, 163, 164, 165, 170, 171, 172, 173, 174, 175, 179, 180, 181, 182, 183, 184, 185, 186, 187, 188, 189, 190, 191, 192, 193, 194, 195, 196, 197, 198, 199, 200, 201, 202, 203, 204, 205, 206, 207, 208, 230, 231, 232, 233, 234</p> |
| Stroke | CIHI-DAD | ICD-10: I62, I630, I631, I632, I633, I634, I635, I638, I639, I64, H341, I600, I601, I602, I603, I604,                                                                                                                                                                                                                                                                                                                                                                                                                                                                                                                                                                                                                                                                                                                                                                                                                                                                                                                                                                                                                                                                                                                                                                                                                                                                                                                                                                                                                                                                                                                                                                                                                                                                                                                                                                                                                                                                                                                                                                                                                                                                                                                                                                                                                                                                                                                                          |



|                                      |                                |                                                                                                                                                                                                                                                                                       |
|--------------------------------------|--------------------------------|---------------------------------------------------------------------------------------------------------------------------------------------------------------------------------------------------------------------------------------------------------------------------------------|
|                                      |                                | I605, I606, I607, I609, I61, G450, G451, G452, G453, G458, G459, H340                                                                                                                                                                                                                 |
| Atrial fibrillation                  | CIHI-DAD                       | ICD-10: I48                                                                                                                                                                                                                                                                           |
| Ventricular arrhythmia               | CIHI-DAD<br>NACRS              | ICD-10: I472, I4900                                                                                                                                                                                                                                                                   |
| Coronary artery bypass graft surgery | CIHI-DAD<br>OHIP               | CCI: 1IJ76<br>OHIP fee: R742, R743, E654, E645, E652, E646                                                                                                                                                                                                                            |
| Percutaneous coronary intervention   | CIHI-DAD<br>OHIP               | CCI: 1IJ50, 1IJ57GQ, 1IJ54GQAZ<br>OHIP fee: Z434, G262, G298                                                                                                                                                                                                                          |
| Pacemaker                            | CIHI-DAD<br>CIHI-NACRS<br>OHIP | CCI: 1HZ37, 1HD53GRJA, 1HD54GRJA, 1HZ53GRNK, 1HZ53GRNL, 1HZ53GRNM, 1HZ54LANJ, 2HZ07NK 2HZ07NL, 2HZ07NM, 1HZ53GRFR, 1HZ53LAFR, 1HZ53SYFR, 1HD55, 1HZ09, 1HZ55, 2HZ24, 1Hz53GRNN<br>OHIP fee: G303, Z433, Z435, Z443, Z444, Z445, R752, Z412, Z428, E628, G176, G177, G115              |
| Congestive heart failure             | CIHI-DAD<br>OHIP               | ICD-10: I099, I420, I425, I426, I427, I428, I429, I43, I500, I501, I509, I255, J81<br>CCP: 4961, 4962, 4963, 4964<br>CCI: 1HP53, 1HP55, 1HZ53GRFR, 1HZ53LAFR, 1HZ53SYFR<br>OHIP fee: R701, R702, Z429<br>OHIP dx: 428                                                                 |
| Transplant - hepatic                 | CIHI-DAD<br>OHIP               | ICD-10: T86400, T86401, T86402, Z944,<br>CCI: 1OA85<br>OHIP fee: S294, S295, E765, G254                                                                                                                                                                                               |
| Chronic liver disease                | CIHI-DAD<br>OHIP               | ICD-10: B16, B17, B18, B19, I85, R17, R18, R160, R162, B942, Z225, E831, E830, K70, K713, K714, K715, K717, K721, K729, K73, K74, K753, K754, K758, K759, K76, K77<br>OHIP dx: 571, 573, 070<br>OHIP fee: Z551, Z554                                                                  |
| Coronary artery disease              | CIHI-DAD<br>OHIP               | ICD-10: I20, I21, I22, I23, I24, I25, Z955, Z958, Z959, R931, T822<br>CCI: 1IJ26, 1IJ27, 1IJ54, 1IJ57, 1IJ50, 1IJ76<br>CCP: 4801, 4802, 4803, 4804, 4805, 481, 482, 483<br>OHIP fee: R741, R742, R743, G298, E646, E651, E652, E654, E655, G262, Z434, Z448<br>OHIP dx: 410, 412, 413 |
| Diabetic retinopathy                 | CIHI-DAD                       | ICD-10: E1030, E1031, E1032, E1033, E1130, E1131, E1132, E1133, E1330, E1331, E1332, E1333, E1430, E1431, E1432, E1433, H360                                                                                                                                                          |
| Diabetic neuropathy                  | CIHI-DAD                       | ICD-10: E1040, E1041, E1042, E1048, E1049, E1440, E1441, E1442, E1448, E1140, E1141, E1142, E1148, E1340, E1341, E1342, E1348, E1349, G590, G632, G990                                                                                                                                |

|                                     |                  |                                                                                                                                                                                                                                                                                                                                                                                                               |
|-------------------------------------|------------------|---------------------------------------------------------------------------------------------------------------------------------------------------------------------------------------------------------------------------------------------------------------------------------------------------------------------------------------------------------------------------------------------------------------|
| Peripheral vascular disease         | CIHI-DAD<br>OHIP | ICD-10: I700, I702, I708, I709, I731, I738, I739, K551<br>CCP: 5125, 5129, 5014, 5016, 5018, 5028, 5038, 5126, 5159<br>CCI: 1KA76, 1KA50, 1KE76, 1KG50, 1KG57, 1KG76MI, 1KG87, 1IA87LA, 1IB87LA, 1IC87LA, 1ID87, 1KA87LA, 1KE57<br>OHIP fee: R787, R780, R797, R804, R809, R875, R815, R936, R783, R784, R785, E626, R814, R786, R937, R860, R861, R855, R856, R933, R934, R791, E672, R794, R813, R867, E649 |
| Hypertension                        | ODB              |                                                                                                                                                                                                                                                                                                                                                                                                               |
| Hypotension                         | CIHI-DAD         | ICD-10: I95                                                                                                                                                                                                                                                                                                                                                                                                   |
| Hypoglycemia                        | CIHI-DAD         | ICD-10: E15, E160, E161, E162, E1063, E1163, E1363, E1463                                                                                                                                                                                                                                                                                                                                                     |
| Hyperglycemic emergency             | CIHI-DAD         | ICD-10: E1410, E1412, E1010, E1012, E1110, E1112, E1300, E140                                                                                                                                                                                                                                                                                                                                                 |
| Hyponatremia                        | CIHI-DAD         | ICD-10: E871                                                                                                                                                                                                                                                                                                                                                                                                  |
| Influenza vaccination               | OHIP             | OHIP fee: G590, G591                                                                                                                                                                                                                                                                                                                                                                                          |
| Respiratory infection               | CIHI-DAD<br>OHIP | ICD-10: 462, 5191, 5180, 5181, 5812, 51889, 5192, 5193, 5194, 5198, 5199, 3821, 3822, 3823, 3824, 3829, 463, 4660, 485, 481, 514, 486, 4919, 4650, 4658, 4659, 4740, 4741, 4749, 4610, 4611, 4612, 4613, 4618, 4619, 496, 0340<br>ICD-10: J22, J02, J98, H66, J03, H65, J20, J18, J42, J06, J35, J01, J44<br>OHIP dx: 519, 460, 382, 463, 381, 466, 486, 491, 474, 461, 496, 034                              |
| Skin & soft tissue infection        | CIHI-DAD<br>OHIP | ICD-10: L08, L03, T01, L01, T814, A46<br>OHIP dx: 709, 686, 698, 682, 998, 879, 894, 884, 684, 250                                                                                                                                                                                                                                                                                                            |
| Infections, other                   | CIHI-DAD<br>OHIP | ICD-10: A49<br>OHIP dx: 786, 136, 040, 039                                                                                                                                                                                                                                                                                                                                                                    |
| Hyperkalemia                        | CIHI-DAD         | ICD-10: E875                                                                                                                                                                                                                                                                                                                                                                                                  |
| Urinary incontinence                | CIHI-DAD         | ICD-10: N393, N394, R32                                                                                                                                                                                                                                                                                                                                                                                       |
| Urinary retention                   | CIHI-DAD         | ICD-10: R33                                                                                                                                                                                                                                                                                                                                                                                                   |
| Urinary tract infections            | CIHI-DAD         | ICD-10: N10, N11, N12, n136, N151, N159, N160, N300, N308, N309, N340, N390, N410, N411, N412, N413, N431, N45, T835                                                                                                                                                                                                                                                                                          |
| Charlson comorbidity index          | CIHI-DAD         |                                                                                                                                                                                                                                                                                                                                                                                                               |
| <b>Healthcare Utilization</b>       |                  |                                                                                                                                                                                                                                                                                                                                                                                                               |
| Number of any hospitalizations      | CIHI-DAD         |                                                                                                                                                                                                                                                                                                                                                                                                               |
| Number of any emergency room visits | NACRS            |                                                                                                                                                                                                                                                                                                                                                                                                               |
| GP/FP visits                        | OHIP<br>IPDB     |                                                                                                                                                                                                                                                                                                                                                                                                               |
| Cardiologist visits                 | IPDB             |                                                                                                                                                                                                                                                                                                                                                                                                               |
| Ophthalmologist visits              | IPDB             |                                                                                                                                                                                                                                                                                                                                                                                                               |
| Endocrinologist visits              | IPDB             |                                                                                                                                                                                                                                                                                                                                                                                                               |

|                                          |                  |                                                                                                                                                                                                    |
|------------------------------------------|------------------|----------------------------------------------------------------------------------------------------------------------------------------------------------------------------------------------------|
| Nephrologist visits                      | OHIP<br>IPDB     |                                                                                                                                                                                                    |
| Diabetes management                      | OHIP             | OHIP fee: K030                                                                                                                                                                                     |
| Diabetes incentive                       | OHIP             | OHIP fee: Q040                                                                                                                                                                                     |
| Diabetes management by a specialist      | OHIP             | OHIP fee: K045                                                                                                                                                                                     |
| Diabetes management by a specialist team | OHIP             | OHIP fee: K046                                                                                                                                                                                     |
| Cholesterol tests                        | OHIP             | OHIP fee: L055                                                                                                                                                                                     |
| Proteinuria                              | OHIP             | OHIP fee: L253, L254, L255, G009, G010                                                                                                                                                             |
| Serum creatine tests                     | OHIP             | OHIP fee: L065, L067, L068                                                                                                                                                                         |
| Glucose tests                            | OHIP             | OHIP fee: L104, L253, L103, L111                                                                                                                                                                   |
| HbA1c tests                              | OHIP             | OHIP fee: L093                                                                                                                                                                                     |
| DVT/PE                                   | CIHI-DAD         | ICD-10: I26, I743, I801, I802, I803                                                                                                                                                                |
| Bone mineral density test                | OHIP             | OHIP fee: J654, J688, J854, J888, X149, X152, X153, X155, Y654, Y688, Y854, Y888                                                                                                                   |
| Hearing test                             | OHIP             | OHIP fee: G153, G154, G440, G441, G442, G443, G448, G450, G451, G452, G525, G526, G529, G530, G533, G815, G816                                                                                     |
| Sputum                                   | OHIP             | OHIP fee: L629, L716, L815                                                                                                                                                                         |
| Wound swab                               | OHIP             | OHIP fee: L628                                                                                                                                                                                     |
| Holter monitoring                        | CIHI-DAD<br>OHIP | CCI: 2HZ24JAKH<br>OHIP fee: G311, G320, G647, G648, G649, G650, G651, G652, G653, G654, G655, G656, G657, G658, G659, G660, G661, G682, G683, G684, G685, G686, G687, G688, G689, G690, G692, G693 |
| Cardiac stress test                      | CIHI-DAD<br>OHIP | CCP: 0341, 0342, 0343, 0344, 0605<br>CCI: 2HZ08, 3IP70<br>OHIP fee: G315, G174, G111, G112, G319, G582, G583, G584, J607, J608, J807, J808, J809, J866, J609, J666                                 |
| Coronary revascularization               | CIHI-DAD<br>OHIP | CCP: 481, 482, 483, 480<br>CCI: 1IJ50, 1IJ26, 1IJ27, 1IJ57, 1IJ76, 1IJ57GQ, 1IJ54GQAZ<br>OHIP fee: R741, R742, R743, E651, E652, E654, E646, G298, Z434, G262                                      |
| Electrocardiography                      | CIHI-DAD<br>OHIP | CCI: 2HZ24JAKE<br>OHIP fee: G310, G313                                                                                                                                                             |
| Pulmonary function test                  | OHIP             | OHIP fee: L354, L358                                                                                                                                                                               |
| At-home physician service                | OHIP             | OHIP fee: A901, B960, B961, B962, B963, B964, B966, B990, B992, B993, B994, B996, B997, B998                                                                                                       |
| Urinalysis                               | OHIP             | OHIP Fee: L253, L254, L255, L633, L634, L641, G009, G010                                                                                                                                           |
| Cystoscopy                               | OHIP             | OHIP fee: Z606, Z607, Z628, Z632, Z633, Z634                                                                                                                                                       |
| Transurethral resection of the prostate  | CIHI-DAD<br>OHIP | CCI: 1QT59BAAD, 1QT59BAAG, 1QT59BAAW, 1QT59BAAZ, 1QT59BACG, 1QT59BAGX, 1QT87BA, 1QT87BAAG, 1QT87BAAK                                                                                               |

|                                |                  |                                                                                                                                                                                                                                                |
|--------------------------------|------------------|------------------------------------------------------------------------------------------------------------------------------------------------------------------------------------------------------------------------------------------------|
|                                |                  | CCP: 721<br>OHIP fee: S655                                                                                                                                                                                                                     |
| Carotid ultrasound             | CIHI-DAD<br>OHIP | CCP: 0281<br>CCI: 3JE30, 3JG30<br>OHIP fee: J201, J501, J190, J191, J490, J491, J492                                                                                                                                                           |
| Cardiac catheterization        | CIHI-DAD<br>OHIP | CCP: 4995, 4996, 4997, 4892, 4893, 4894, 4895, 4896, 4897, 4898<br>CCI: 3IJ30GP, 3HZ30GP, 2HZ24GPKJ, 2HZ24GPKL, 2HZ24GPKM, 2HZ24GPXJ, 2HZ28GPPL, 2HZ71GP, 3IP10, 3IS10<br>OHIP fee: G296, G297, G299, G300, G301, G304, G305, G306, G297, G509 |
| Coronary angiogram             | CIHI-DAD<br>OHIP | CCP: 4892, 4893, 4894, 4895, 4896, 4897, 4898<br>CCI: 3IP10, 3IS10<br>OHIP fee: G297, G509                                                                                                                                                     |
| Electroencephalography (EEG)   | OHIP             | OHIP fee: G414, G415, G416, G417, G418, G540, G542, G544, G545, G546, G554, G555                                                                                                                                                               |
| Chest x-ray                    | OHIP             | OHIP fee: X090, X091, X092, X195                                                                                                                                                                                                               |
| Echocardiography               | CIHI-DAD<br>OHIP | CCP: 0282<br>CCI: 3IP30<br>OHIP fee: G560, G561, G562, G566, G567, G568, G570, G571, G572, G574, G575, G576, G577, G578, G581                                                                                                                  |
| Prostate-specific antigen test | OHIP             | OHIP fee: Q005, Q118, Q119, Q120, Q121, Q122, Q123, Q133                                                                                                                                                                                       |
| Cervical cancer screening      | OHIP             | OHIP fee: E430, G365, G394, L713, L812                                                                                                                                                                                                         |
| <b>Laboratory Measurements</b> |                  |                                                                                                                                                                                                                                                |
| eGFR (using serum creatinine)  | OLIS             |                                                                                                                                                                                                                                                |
| Serum creatinine               | OLIS             | OLIS: 14682-9                                                                                                                                                                                                                                  |
| Serum potassium                | OLIS             | OLIS: 2823-3, 6298-4, 39789-3                                                                                                                                                                                                                  |
| Albumin-to-creatinine ratio    | OLIS             | OLIS: 14959-1, 30000-4, 32294-1                                                                                                                                                                                                                |
| Glycated hemoglobin            | OLIS             | OLIS: 4548-4, 71875-9, 59261-8, 17855-8, 17856-6, 41995-2                                                                                                                                                                                      |

**Appendix 1F. Standard daily drug doses of SGLT2 inhibitors and DPP4 inhibitors (15)**

| <b>Drug</b>             | <b>Standard daily drug doses (mg/day)</b> |
|-------------------------|-------------------------------------------|
| <b>SGLT2 inhibitors</b> |                                           |
| Canagliflozin           | 100 or 300                                |
| Empagliflozin           | 10 or 25                                  |
| Dapagliflozin           | 5 or 10                                   |
| <b>DPP4 inhibitors</b>  |                                           |
| Saxagliptin             | 2.5 or 5                                  |
| Sitagliptin             | 25, 50 or 100                             |
| Linagliptin             | 5                                         |

**Appendix 1G. 2012 KDIGO thresholds for AKI stages (16)**

| <b>Stage</b> | <b>Definition</b>                                                                                                                              |
|--------------|------------------------------------------------------------------------------------------------------------------------------------------------|
| 1            | 50 to <100% increase in serum creatinine from baseline or an absolute increase $\geq 0.3$ mg/dL, but does not meet stage two or three criteria |
| 2            | 100 to <200% increase from baseline                                                                                                            |
| 3            | $\geq 200\%$ increase from baseline, absolute serum creatinine value of 4.0 mg/dL, or receipt of acute dialysis                                |

**Appendix 1H. ACE inhibitors, ARBs and all type of diuretic drugs included in the subgroup analysis**

| <b>Drug Name</b>         | <b>Drug Identification Numbers</b>                                                                                                                                                                                                                                                                                                                                                                                                                                                                                                                                                                                                                                                  |
|--------------------------|-------------------------------------------------------------------------------------------------------------------------------------------------------------------------------------------------------------------------------------------------------------------------------------------------------------------------------------------------------------------------------------------------------------------------------------------------------------------------------------------------------------------------------------------------------------------------------------------------------------------------------------------------------------------------------------|
| <i>ACE inhibitor</i>     |                                                                                                                                                                                                                                                                                                                                                                                                                                                                                                                                                                                                                                                                                     |
| Captopril                | 00546283, 00546291, 00546305, 00695661, 00851639, 00851647, 00851655, 00851833, 00893595, 00893609, 00893617, 00893625, 01913824, 01913832, 01913840, 01913859, 01942964, 01942972, 01942980, 01942999, 02163551, 02163578, 02163586, 02163594, 02230203, 02230204, 02230205, 02230206, 02237861, 02237862, 02237863, 02242788, 02242789, 02242790, 02242791                                                                                                                                                                                                                                                                                                                        |
| Lisinopril               | 00839329, 00839337, 00839388, 00839396, 00839418, 00839442, 02049333, 02049376, 02049384, 02217481, 02217503, 02217511, 02256797, 02256800, 02256819, 02271443, 02271451, 02271478, 02274833, 02274841, 02274868, 02285061, 02285088, 02285096, 02285118, 02285126, 02285134, 02289199, 02289202, 02289229, 02292203, 02292211, 02292238, 02294230, 02294249, 02294257, 02294591, 02299879, 02299887, 02299895, 02332167, 02332175, 02332183, 02361531, 02361558, 02361566, 02394472, 02394480, 02394499, 09853685, 09853960, 09854010, 09857272, 09857286, 09857287                                                                                                                |
| Enalapril sodium         | 00670901, 00670928, 00708879, 00708887, 00851795, 02019884, 02019892, 02019906, 02020025, 02233005, 02233006, 02233007, 02291878, 02291886, 02291894, 02291908, 02299933, 02299941, 02299968, 02299976, 02299984, 02299992, 02300001, 02300028, 02300036, 02300044, 02300052, 02300060, 02300079, 02300087, 02300095, 02300109, 02300117, 02300125, 02300133, 02300141, 02300680, 02352230, 02352249, 02352257, 02352265                                                                                                                                                                                                                                                            |
| Benazepril chlorohydrate | 00885835, 00885843, 00885851                                                                                                                                                                                                                                                                                                                                                                                                                                                                                                                                                                                                                                                        |
| Cilazapril               | 01911465, 01911473, 01911481, 02266350, 02266369, 02266377, 02280442, 02280450, 02280469, 02283778, 02283786, 02283794, 02285215, 02285223, 02291134, 02291142, 02291150                                                                                                                                                                                                                                                                                                                                                                                                                                                                                                            |
| Quinapril                | 01947664, 01947672, 01947680, 01947699, 02248499, 02248500, 02248501, 02248502, 02290987, 02290995, 02291002, 02291010                                                                                                                                                                                                                                                                                                                                                                                                                                                                                                                                                              |
| Ramipril                 | 02050943, 02050951, 02050978, 02050986, 02221829, 02221837, 02221845, 02221853, 02247917, 02247918, 02247919, 02247945, 02247946, 02247947, 02251515, 02251531, 02251574, 02251582, 02255316, 02255324, 02255332, 02283891, 02287692, 02287706, 02287714, 02287722, 02287927, 02287935, 02287943, 02291398, 02291401, 02291428, 02291436, 02295369, 02295482, 02295490, 02295504, 02295512, 02299372, 02301148, 02301156, 02301164, 02301172, 02310503, 02310511, 02310538, 02310546, 02331101, 02331128, 02331136, 02331144, 02332299, 02332302, 02332310, 02332329, 02374846, 02374854, 02374862, 02387387, 02387395, 02387409, 02387417, 02420457, 02420465, 02420473, 02420481, |

|                                           |                                                                                                                                                                                                                                                                                                                                                                                                                          |
|-------------------------------------------|--------------------------------------------------------------------------------------------------------------------------------------------------------------------------------------------------------------------------------------------------------------------------------------------------------------------------------------------------------------------------------------------------------------------------|
|                                           | 02421305, 02421313, 02421321, 02438860, 02438879, 02438887, 02438895                                                                                                                                                                                                                                                                                                                                                     |
| Perindopril tert-butylamine               | 02123274, 02123282, 02246624                                                                                                                                                                                                                                                                                                                                                                                             |
| Trandolapril                              | 02231459, 02231460, 02239267                                                                                                                                                                                                                                                                                                                                                                                             |
| Fosinopril                                | 02242733, 02242734, 02262401, 02262428, 02331004, 02331012                                                                                                                                                                                                                                                                                                                                                               |
| Fosinopril sodium                         | 02247802, 02247803, 02255944, 02255952, 02266008, 02266016, 02275252, 02275260, 02294524, 02294532, 02332566, 02332574, 01907107, 01907115                                                                                                                                                                                                                                                                               |
| Benazapril HCL                            | 02273918, 02290332, 02290340                                                                                                                                                                                                                                                                                                                                                                                             |
| Hydrochlorothiazide & Lisinopril          | 02301768                                                                                                                                                                                                                                                                                                                                                                                                                 |
| <b>ARB</b>                                |                                                                                                                                                                                                                                                                                                                                                                                                                          |
| Losartan potassium                        | 02182815, 02182874, 02182882, 02309750, 02309769, 02309777, 02313332, 02313340, 02313359, 02353504, 02353512, 02354829, 02354837, 02354845, 02357968, 02357976, 02368277, 02368285, 02368293, 02379058, 02380838, 02398834, 02398842, 02398850, 02403323, 02403331, 02403358, 02404451, 02404478, 02404486, 02405733, 02405741, 02405768, 02422468, 02422484, 02424967, 02424975, 02424983, 02426595, 02426609, 02426617 |
| Valsartan                                 | 02236808, 02236809, 02244781, 02244782, 02289504, 02313006, 02313014, 02337495, 02337509, 02337517, 02344564, 02356651, 02356678, 02356686, 02356759, 02356767, 02356775, 02363100, 02363119, 02371529, 02371537, 02371545, 02383535, 02383543, 02383551, 02414228, 02414236, 02414244                                                                                                                                   |
| Irbesartan                                | 02237923, 02237924, 02237925, 02315971, 02315998, 02316005, 02316390, 02316404, 02316412, 02317060, 02317079, 02317087, 02328070, 02328089, 02328100, 02328461, 02328488, 02328496, 02347296, 02347318, 02347326, 02386968, 02386976, 02386984, 02406810, 02406829, 02406837, 02418193, 02418207, 02418215, 02422980, 02422999, 02423006, 02427087, 02427095, 02427109                                                   |
| Candesartan Cilexetil                     | 02239090, 02239091, 02239092, 02311658, 02326957, 02326965, 02326973, 02365340, 02365359, 02365367, 02366312, 02366320, 02366339, 02376520, 02376539, 02376547, 02376555, 02379120, 02379139, 02379147, 02379155, 02379260, 02379279, 02379287, 02379295, 02380684, 02380692, 02380706, 02380714, 02386496, 02386518, 02386526, 02386534, 02391171, 02391198, 02391201, 02391228, 02392267, 02399105, 02417340           |
| Eprosartan Mesylate                       | 02240431, 02240432, 02243942                                                                                                                                                                                                                                                                                                                                                                                             |
| Telmisartan                               | 02240769, 02240770, 02320177, 02320185, 02375958, 02375966, 02376717, 02376725, 02391236, 02391244, 02393247, 02393255, 02407485, 02407493, 02420082, 02420090, 02432897, 02432900, 02434164                                                                                                                                                                                                                             |
| Eprosartan Mesylate & Hydrochlorothiazide | 02253631                                                                                                                                                                                                                                                                                                                                                                                                                 |
| Olmesartan Medoxomil                      | 02318660, 02318679                                                                                                                                                                                                                                                                                                                                                                                                       |
| Hydrochlorothiazide & Quinopril           | 02408775                                                                                                                                                                                                                                                                                                                                                                                                                 |
| Hydrochlorothiazide & Telmisartan         | 02433214                                                                                                                                                                                                                                                                                                                                                                                                                 |
| <b>Loop Diuretics</b>                     |                                                                                                                                                                                                                                                                                                                                                                                                                          |
| Bumetanide                                | 00728276, 00728284, 02176076                                                                                                                                                                                                                                                                                                                                                                                             |



|                                            |                                                                                                                                                                                                                                                                    |
|--------------------------------------------|--------------------------------------------------------------------------------------------------------------------------------------------------------------------------------------------------------------------------------------------------------------------|
| Ethacrynic acid                            | 00016497, 02258528                                                                                                                                                                                                                                                 |
| Furosemide                                 | 00012580, 00217743, 00289590, 00332275, 00337730, 00337749, 00344079, 00353612, 00362166, 00380016, 00380024, 00396249, 00396788, 00432342, 00527033, 01900943, 01987585, 01987615, 01987739, 01987798, 01988832, 02224690, 02224704, 02224720, 02224755, 09857208 |
| <b><i>Potassium Sparring Diuretics</i></b> |                                                                                                                                                                                                                                                                    |
| Amiloride HCL                              | 00487805, 02249510                                                                                                                                                                                                                                                 |
| Amiloride HCL & Hydrochlorothiazide        | 00487813, 00784400, 00886106, 01937219, 02174596, 02257378                                                                                                                                                                                                         |
| Eplerenone                                 | 02323052, 02323060                                                                                                                                                                                                                                                 |
| Hydrochlorothiazide & Spironolactone       | 00180408, 00594377, 00613231, 00657182                                                                                                                                                                                                                             |
| Hydrochlorothiazide & Trimolol Maleate     | 00509353                                                                                                                                                                                                                                                           |
| Hydrochlorothiazide & Triamterene          | 00181528, 00441775, 00532657, 00865532, 01910191, 01919547                                                                                                                                                                                                         |
| Spironolactone                             | 00028606, 00285455, 00613215, 00613223                                                                                                                                                                                                                             |
| Triamterene                                | 00027138, 00299715, 01919563, 01919571                                                                                                                                                                                                                             |
| <b><i>Thiazide Diuretics</i></b>           |                                                                                                                                                                                                                                                                    |
| Chlorthalidone                             | 00010413, 00010421, 00293881, 00298964, 00337447, 00337455, 00360279, 00360287, 00398365, 00398373                                                                                                                                                                 |
| Hydrochlorothiazide                        | 00016500, 00016519, 00021474, 00021482, 00092681, 00092703, 00263907, 00312800, 00326844, 02247386, 02247387                                                                                                                                                       |
| Indapamide                                 | 00564966, 02049341, 02153483, 02179709, 02223597, 02223678, 02227339, 02231184, 02239619, 02239620, 02240067, 02245246, 02373904, 02373912                                                                                                                         |
| Metolazone                                 | 00301663, 00301671, 00301698, 00888400, 00888419, 00888427                                                                                                                                                                                                         |

## Appendix 11. Variables included in the propensity score model

| Variables included in the propensity score |                                                                                                                                                                                                                                                                                                                                                                                                                                                                                                                                                                                                                                               |
|--------------------------------------------|-----------------------------------------------------------------------------------------------------------------------------------------------------------------------------------------------------------------------------------------------------------------------------------------------------------------------------------------------------------------------------------------------------------------------------------------------------------------------------------------------------------------------------------------------------------------------------------------------------------------------------------------------|
| Demographics                               | Age<br>Sex<br>Entry year<br>Rural residence<br>Neighbourhood income quintile<br>Local Health Integration Network                                                                                                                                                                                                                                                                                                                                                                                                                                                                                                                              |
| Comorbidities                              | Duration of diabetes<br>Acute kidney injury<br>Chronic kidney disease<br>Acute urinary retention<br>Chronic obstructive pulmonary disease<br>Chronic lung disease<br>Percutaneous coronary intervention<br>Pacemaker<br>Cancer<br>Stroke<br>Atrial fibrillation<br>Ventricular arrhythmia<br>Coronary artery bypass graft surgery<br>Congestive heart failure<br>Chronic liver disease<br>Coronary artery disease<br>Diabetic retinopathy<br>Diabetic neuropathy<br>Peripheral vascular disease<br>Hypertension<br>Hypotension<br>Hypoglycemia<br>Hyponatremia<br>Hyperkalemia<br>Charlson comorbidity index                                  |
| Medications                                | Angiotensin-converting enzyme inhibitors<br>Angiotensin receptor blockers<br>Acetylsalicylic acid<br>Beta blockers<br>Calcium channel blockers<br>Loop diuretics<br>Potassium sparing diuretics<br>Nonsteroidal anti-inflammatory drugs<br>Statins<br>Thiazide diuretics<br>Proton pump inhibitors<br>Picosalax<br>Insulin use 120 days prior to the cohort entry date<br>Acarbose use 120 days prior to the cohort entry date<br>Gliclazide use 120 days prior to the cohort entry date<br>Glyburide use 120 days prior to the cohort entry date<br>Metformin use 120 days prior to the cohort entry date<br>Pioglitazine use 120 days prior |

|                        |                                                                                                                                                                                                                                                                                                                                                                                                                                                                                                                                                                                                                                                                                                                                                                                                                                                                                                                                                                                                                                     |
|------------------------|-------------------------------------------------------------------------------------------------------------------------------------------------------------------------------------------------------------------------------------------------------------------------------------------------------------------------------------------------------------------------------------------------------------------------------------------------------------------------------------------------------------------------------------------------------------------------------------------------------------------------------------------------------------------------------------------------------------------------------------------------------------------------------------------------------------------------------------------------------------------------------------------------------------------------------------------------------------------------------------------------------------------------------------|
|                        | <p>Insulin use on the cohort entry date<br/> Acarbose use on the cohort entry date<br/> Gliclazide use on the cohort entry date<br/> Glyburide use on the cohort entry date<br/> Metformin use on the cohort entry date<br/> Insulin use in the 1 year to 120 days prior to the cohort entry date<br/> Acarbose use in the 1 year to 120 days prior to the cohort entry date<br/> Gliclazide use in the 1 year to 120 days prior to the cohort entry date<br/> Glyburide use in the 1 year to 120 days prior to the cohort entry date<br/> Metformin use in the 1 year to 120 days prior to the cohort entry date<br/> Pioglitazine use in the 1 year to 120 days prior to the cohort entry date</p>                                                                                                                                                                                                                                                                                                                                |
| Healthcare Utilization | <p>Number of any hospitalizations<br/> Number of emergency department visits<br/> Number of general practice or family practice visits<br/> Number of cardiologist visits<br/> Number of ophthalmologist visits<br/> Number of endocrinologist visits<br/> Number of nephrologist visits<br/> Diabetes management<br/> Diabetes incentive<br/> Diabetes management by a specialist<br/> Diabetes management by a specialist team<br/> Cholesterol test<br/> Proteinuria<br/> Serum creatinine test<br/> Glucose test<br/> Glycosylated hemoglobin test<br/> Bone mineral density test<br/> Hearing test<br/> Holter monitoring<br/> Cardiac stress test<br/> Coronary revascularization<br/> Electrocardiography<br/> Pulmonary function test<br/> At-home physician service<br/> Urinalysis<br/> Cystoscopy<br/> Carotid ultrasound<br/> Cardiac catheterization<br/> Coronary angiogram<br/> Electroencephalography<br/> Chest x-ray<br/> Echocardiography<br/> Prostate-specific antigen test<br/> Cervical cancer screening</p> |
| Other                  | Prescribing physician specialty                                                                                                                                                                                                                                                                                                                                                                                                                                                                                                                                                                                                                                                                                                                                                                                                                                                                                                                                                                                                     |

|  |                                               |
|--|-----------------------------------------------|
|  | Number of medications                         |
|  | Estimated baseline glomerular filtration rate |

**Appendix 1J. All baseline characteristics of older adults with type 2 diabetes newly dispensed SGLT2 inhibitors (canagliflozin, dapagliflozin or empagliflozin) and DPP4 inhibitors (saxagliptin, sitagliptin or linagliptin) in Ontario, Canada (2015-2017)**

| Characteristic <sup>a</sup>                | Observed data                    |                                 |                              | Weighted data <sup>b</sup>       |                                 |                              |
|--------------------------------------------|----------------------------------|---------------------------------|------------------------------|----------------------------------|---------------------------------|------------------------------|
|                                            | No. (%) of patients              |                                 | Stan. Diff. <sup>c</sup> (%) | No. (%) of patients              |                                 | Stan. Diff. <sup>c</sup> (%) |
|                                            | SGLT2 inhibitors<br>(n = 19,611) | DPP4 inhibitors<br>(n = 19,483) |                              | SGLT2 inhibitors<br>(n = 19,611) | DPP4 inhibitors<br>(n = 19,775) |                              |
| <b>SGLT2 inhibitor type</b>                |                                  |                                 |                              |                                  |                                 |                              |
| Canagliflozin                              | 9,404 (48.0)                     |                                 |                              |                                  |                                 |                              |
| Empagliflozin                              | 7,311 (37.3)                     |                                 |                              |                                  |                                 |                              |
| Dapagliflozin                              | 2,896 (14.8)                     |                                 |                              |                                  |                                 |                              |
| <b>DPP4 inhibitor type</b>                 |                                  |                                 |                              |                                  |                                 |                              |
| Sitagliptin                                |                                  | 13,086 (67.2)                   |                              |                                  |                                 |                              |
| Linagliptin                                |                                  | 4,726 (24.3)                    |                              |                                  |                                 |                              |
| Saxagliptin                                |                                  | 1,671 (8.6)                     |                              |                                  |                                 |                              |
| <b>Demographics</b>                        |                                  |                                 |                              |                                  |                                 |                              |
| Age, year, mean ± SD                       | 71.4 (4.86)                      | 74.1 (6.3)                      | 47                           | 71.4 (4.9)                       | 71.4 (5.0)                      | 1                            |
| Age, year, median (IQR)                    | 70 (68 to 74)                    | 73 (69 to 78)                   | 43                           | 70 (68 to 74)                    | 70 (68 to 74)                   | 1                            |
| 66-74                                      | 15,017 (76.6)                    | 11,415 (58.6)                   | 39                           | 15,017 (76.6)                    | 15,224 (77.0)                   | 1                            |
| 75-84                                      | 4,249 (21.7)                     | 6,586 (33.8)                    | 27                           | 4,249 (21.7)                     | 4,153 (21.0)                    | 2                            |
| 85+                                        | 345 (1.8)                        | 1,482 (7.6)                     | 28                           | 345 (1.8)                        | 398 (2.0)                       | 1                            |
| Women                                      | 7,903 (40.3)                     | 9,325 (47.9)                    | 15                           | 7,903 (40.3)                     | 8,104 (41.0)                    | 1                            |
| Rural Residence <sup>d</sup>               | 2,192 (11.2)                     | 2,088 (10.7)                    | 2                            | 2,192 (11.2)                     | 2,423 (12.3)                    | 3                            |
| Year of cohort entry                       |                                  |                                 |                              |                                  |                                 |                              |
| 2015                                       | 3,571 (18.2)                     | 4,260 (21.9)                    | 9                            | 3,571 (18.2)                     | 3,187 (16.1)                    | 6                            |
| 2016                                       | 8,060 (41.1)                     | 9,153 (47.0)                    | 12                           | 8,060 (41.1)                     | 8,940 (45.2)                    | 8                            |
| 2017                                       | 7,980 (40.7)                     | 6,070 (31.2)                    | 20                           | 7,980 (40.7)                     | 7,647 (38.7)                    | 4                            |
| Neighbourhood income quintile <sup>e</sup> |                                  |                                 |                              |                                  |                                 |                              |
| 1 (low)                                    | 4,350 (22.2)                     | 4,566 (23.4)                    | 3                            | 4,350 (22.2)                     | 4,397 (22.2)                    | 0                            |
| 2                                          | 4,236 (21.6)                     | 4,390 (22.5)                    | 2                            | 4,236 (21.6)                     | 4,328 (21.9)                    | 1                            |
| 3                                          | 4,011 (20.5)                     | 3,953 (20.3)                    | 0                            | 4,044 (20.6)                     | 4,047 (20.5)                    | 0                            |
| 4                                          | 3,679 (18.8)                     | 3,513 (18.0)                    | 2                            | 3,679 (18.8)                     | 3,683 (18.6)                    | 1                            |
| 5 (high)                                   | 3,302 (16.8)                     | 3,043 (15.6)                    | 3                            | 3,302 (16.8)                     | 3,321 (16.8)                    | 0                            |
| Local health integration network           |                                  |                                 |                              |                                  |                                 |                              |
| 1                                          | 36 (0.2)                         | 15 (0.1)                        | 3                            | 36 (0.2)                         | 29 (0.1)                        | 3                            |
| 2                                          | 1,765 (9.0)                      | 1,890 (9.7)                     | 2                            | 1,765 (9.0)                      | 1,869 (9.4)                     | 1                            |
| 3                                          | 254 (1.3)                        | 179 (0.9)                       | 4                            | 254 (1.3)                        | 262 (1.3)                       | 0                            |
| 4                                          | 21 (0.1)                         | 19 (0.1)                        | 0                            | 21 (0.1)                         | 23 (0.1)                        | 0                            |
| 5                                          | 1,864 (9.5)                      | 1,954 (10.0)                    | 2                            | 1,864 (9.5)                      | 1,797 (9.1)                     | 1                            |
| 6                                          | 2,121 (10.8)                     | 2,696 (13.8)                    | 9                            | 2,121 (10.8)                     | 2,162 (10.9)                    | 0                            |
| 7                                          | 1,774 (9.0)                      | 1,852 (9.5)                     | 2                            | 1,774 (9.0)                      | 1,873 (9.5)                     | 2                            |
| 8                                          | 3,441 (17.5)                     | 3,332 (17.1)                    | 1                            | 3,441 (17.5)                     | 3,167 (16.0)                    | 4                            |
| 9                                          | 4,897 (25.0)                     | 4,218 (21.6)                    | 8                            | 4,897 (25.0)                     | 5,058 (25.6)                    | 1                            |
| 10                                         | 967 (4.9)                        | 751 (3.9)                       | 5                            | 967 (4.9)                        | 1,019 (5.2)                     | 1                            |
| 11                                         | 290 (1.5)                        | 345 (1.8)                       | 2                            | 290 (1.5)                        | 278 (1.4)                       | 1                            |
| 12                                         | 996 (5.1)                        | 813 (4.2)                       | 4                            | 996 (5.1)                        | 1,00 (5.1)                      | 0                            |
| 13                                         | 825 (4.2)                        | 984 (5.1)                       | 4                            | 825 (4.2)                        | 874 (4.4)                       | 1                            |
| 14                                         | 360 (1.8)                        | 435 (2.2)                       | 3                            | 360 (1.8)                        | 363 (1.8)                       | 0                            |

| <b>Prescriber Speciality</b>                  |                |                |    |                |                |   |
|-----------------------------------------------|----------------|----------------|----|----------------|----------------|---|
| Cardiologist                                  | 413 (2.1)      | 108 (0.6)      | 13 | 413 (2.1)      | 506 (2.6)      | 3 |
| Endocrinologist                               | 3,786 (19.3)   | 1,475 (7.6)    | 35 | 3,786 (19.3)   | 3,574 (18.1)   | 3 |
| General practitioner                          | 12,798 (65.3)  | 15,685 (80.5)  | 35 | 12,798 (65.3)  | 12,927 (65.4)  | 0 |
| Internist                                     | 1,139 (5.8)    | 540 (2.8)      | 15 | 1,139 (5.8)    | 1,232 (6.2)    | 2 |
| Nephrologist                                  | 217 (1.1)      | 97 (0.5)       | 7  | 217 (1.1)      | 234 (1.2)      | 1 |
| Other                                         | 167 (0.9)      | 317 (1.6)      | 6  | 167 (0.9)      | 171 (0.9)      | 0 |
| Missing                                       | 1,091 (5.6)    | 1,261 (6.5)    | 4  | 1,091 (5.6)    | 1,131 (5.7)    | 0 |
| <b>Comorbidities in prior 5 years</b>         |                |                |    |                |                |   |
| Duration of diabetes, years, mean $\pm$ SD    | 13.8 $\pm$ 6.9 | 12.0 $\pm$ 7.2 | 25 | 13.8 $\pm$ 6.9 | 13.8 $\pm$ 7.1 | 1 |
| Duration of diabetes, years, median (IQR)     | 14 (9 to 19)   | 12 (6 to 17)   | 25 | 14 (9 to 19)   | 14 (8 to 20)   | 1 |
| <1 year                                       | 699 (3.6)      | 1,357 (7.0)    | 15 | 699 (3.6)      | 696 (3.5)      | 1 |
| 1-4 years                                     | 1,707 (8.7)    | 2,435 (12.5)   | 12 | 1,707 (8.7)    | 1,767 (8.9)    | 1 |
| 5-9 years                                     | 3,611 (18.4)   | 4,303 (22.1)   | 9  | 3,611 (18.4)   | 3,733 (18.9)   | 1 |
| 10-19 years                                   | 9,319 (47.5)   | 8,114 (41.6)   | 12 | 9,319 (47.5)   | 8,984 (45.4)   | 4 |
| 20-29 years                                   | 4,275 (21.8)   | 3,274 (16.8)   | 13 | 4,275 (21.8)   | 4,595 (23.2)   | 3 |
| Diabetic retinopathy                          | 168 (0.9)      | 140 (0.7)      | 2  | 168 (0.9)      | 172 (0.9)      | 0 |
| Diabetic neuropathy                           | 231 (1.2)      | 257 (1.3)      | 1  | 231 (1.2)      | 223 (1.1)      | 1 |
| Hypoglycemia                                  | 115 (0.6)      | 185 (0.9)      | 3  | 115 (0.6)      | 127 (0.6)      | 0 |
| Hyperglycemic emergency                       | 47 (0.2)       | 82 (0.4)       | 4  | 47 (0.2)       | 75 (0.4)       | 4 |
| Prior acute kidney injury                     | 351 (1.8)      | 702 (3.6)      | 11 | 351 (1.8)      | 395 (2.0)      | 1 |
| Prior acute urinary retention                 | 252 (1.3)      | 452 (2.3)      | 8  | 252 (1.3)      | 237 (1.2)      | 1 |
| Chronic obstructive pulmonary disease         | 396 (2.0)      | 490 (2.5)      | 3  | 396 (2.0)      | 453 (2.3)      | 2 |
| Chronic lung disease                          | 3,885 (19.8)   | 3,976 (20.4)   | 1  | 3,885 (19.8)   | 4,049 (20.5)   | 2 |
| Cancer                                        | 5,586 (28.5)   | 5,987 (30.7)   | 5  | 5,586 (28.5)   | 5,579 (28.2)   | 1 |
| Stroke                                        | 270 (1.4)      | 556 (2.9)      | 10 | 270 (1.4)      | 256 (1.3)      | 1 |
| Atrial Fibrillation                           | 717 (3.7)      | 930 (4.8)      | 5  | 717 (3.7)      | 702 (3.5)      | 1 |
| Ventricular arrhythmia                        | 61 (0.3)       | 76 (0.4)       | 2  | 61 (0.3)       | 66 (0.3)       | 0 |
| Coronary artery bypass graft surgery          | 513 (2.6)      | 372 (1.9)      | 5  | 513 (2.6)      | 514 (2.6)      | 0 |
| Percutaneous coronary intervention            | 1,051 (5.4)    | 777 (4.0)      | 7  | 1,051 (5.4)    | 1,010 (5.1)    | 1 |
| Pacemaker                                     | 543 (2.8)      | 561 (2.9)      | 1  | 543 (2.8)      | 518 (2.6)      | 1 |
| Congestive heart failure                      | 1,649 (8.4)    | 1,876 (9.6)    | 4  | 1,649 (8.4)    | 1,674 (8.5)    | 0 |
| Transplant - hepatic                          | 8 (0.0)        | 7 (0.0)        | 4  | 8 (0.0)        | 9 (0.0)        | 0 |
| Chronic liver disease                         | 947 (4.8)      | 978 (5.0)      | 1  | 947 (4.8)      | 916 (4.6)      | 1 |
| Coronary artery disease                       | 6,665 (34.0)   | 5,985 (30.7)   | 7  | 6,665 (34.0)   | 6,669 (33.7)   | 1 |
| Peripheral vascular disease                   | 202 (1.0)      | 218 (1.1)      | 1  | 202 (1.0)      | 188 (1.0)      | 0 |
| Hypertension                                  | 15,302 (78.0)  | 13,528 (69.4)  | 20 | 15,302 (78.0)  | 15,477 (78.3)  | 1 |
| Hypotension                                   | 176 (0.9)      | 297 (1.5)      | 6  | 176 (0.9)      | 157 (0.8)      | 1 |
| Hyponatremia                                  | 202 (1.0)      | 393 (2.0)      | 8  | 202 (1.0)      | 203 (1.0)      | 0 |
| Influenza vaccination                         | 14,066 (71.7)  | 13,393 (68.7)  | 7  | 14,066 (71.7)  | 13,912 (70.4)  | 3 |
| Prior respiratory infection                   | 12,540 (63.9)  | 12,169 (62.5)  | 3  | 12,540 (63.9)  | 12,559 (63.5)  | 1 |
| Prior skin & soft tissue infection            | 19,428 (99.1)  | 19,112 (98.1)  | 9  | 19,428 (99.1)  | 19,602 (99.1)  | 0 |
| Prior other infections                        | 6,343 (32.3)   | 6,299 (32.3)   | 0  | 6,343 (32.3)   | 6,391 (32.3)   | 0 |
| Hyperkalemia                                  | 85 (0.4)       | 131 (0.7)      | 4  | 85 (0.4)       | 86 (0.4)       | 0 |
| Urinary incontinence                          | 195 (1.0)      | 209 (1.1)      | 1  | 195 (1.0)      | 177 (0.9)      | 1 |
| Urinary retention                             | 252 (1.3)      | 452 (2.3)      | 8  | 252 (1.3)      | 237 (1.2)      | 1 |
| Prior urinary tract infections                | 578 (2.9)      | 1,015 (5.2)    | 12 | 578 (2.9)      | 661 (3.3)      | 2 |
| <b>Charlson comorbidity score<sup>f</sup></b> |                |                |    |                |                |   |
| Mean $\pm$ SD                                 | 0.3 $\pm$ 0.9  | 0.5 $\pm$ 1.2  | 14 | 0.3 $\pm$ 0.9  | 0.3 $\pm$ 1.0  | 1 |
| Median (IQR)                                  | 0 (0 to 0)     | 0 (0 to 0)     | 13 | 0 (0 to 0)     | 0 (0 to 0)     | 1 |
| 0                                             | 16,722 (85.3)  | 15,676 (80.5)  | 13 | 16,722 (85.3)  | 16,998 (86.0)  | 2 |
| 1                                             | 943 (4.8)      | 1,147 (5.9)    | 5  | 943 (4.8)      | 852 (4.3)      | 2 |

|                                                                                             |               |               |    |               |               |   |
|---------------------------------------------------------------------------------------------|---------------|---------------|----|---------------|---------------|---|
| 2                                                                                           | 862 (4.4)     | 1,044 (5.4)   | 5  | 862 (4.4)     | 862 (4.4)     | 0 |
| 3                                                                                           | 1,084 (5.5)   | 1,616 (8.3)   | 11 | 1,084 (5.5)   | 1,063 (5.4)   | 0 |
| <b>Medications<sup>§</sup></b>                                                              |               |               |    |               |               |   |
| ACE inhibitors                                                                              | 7,155 (36.5)  | 6,128 (31.5)  | 11 | 7,155 (36.5)  | 7,271 (36.8)  | 1 |
| ARB                                                                                         | 4,754 (24.2)  | 4,095 (21.0)  | 8  | 4,754 (24.2)  | 4,856 (24.6)  | 1 |
| ACE or ARB                                                                                  | 11,796 (60.1) | 10,124 (52.0) | 16 | 11,796 (60.1) | 12,008 (60.7) | 1 |
| ACE and ARB                                                                                 | 113 (0.6)     | 99 (0.5)      | 1  | 113 (0.6)     | 120 (0.6)     | 0 |
| Acetylsalicylic acid <sup>h</sup>                                                           | 436 (2.2)     | 395 (2.0)     | 1  | 436 (2.2)     | 497 (2.5)     | 2 |
| Beta blockers                                                                               | 6,427 (32.8)  | 5,679 (29.1)  | 8  | 6,427 (32.8)  | 6,442 (32.6)  | 0 |
| Calcium channel blockers                                                                    | 6,167 (31.4)  | 5,540 (28.4)  | 7  | 6,167 (31.4)  | 6,205 (31.4)  | 0 |
| NSAIDs <sup>i</sup>                                                                         | 2,076 (10.6)  | 1,684 (8.6)   | 7  | 2,076 (10.6)  | 2,144 (10.8)  | 1 |
| Statins                                                                                     | 14,887 (75.9) | 12,257 (62.9) | 28 | 14,887 (75.9) | 15,031 (76.0) | 0 |
| Proton pump inhibitors                                                                      | 4,264 (21.7)  | 4,137 (21.2)  | 1  | 4,264 (21.7)  | 4,352 (22.0)  | 1 |
| Picosalax                                                                                   | 169 (0.9)     | 169 (0.9)     | 0  | 169 (0.9)     | 158 (0.8)     | 1 |
| Cephalosporins                                                                              | 823 (4.2)     | 849 (4.4)     | 1  | 823 (4.2)     | 870 (4.4)     | 1 |
| Lithium                                                                                     | 23 (0.1)      | 28 (0.1)      | 0  | 23 (0.1)      | 30 (0.2)      | 3 |
| Amoxicillin                                                                                 | 1,518 (7.7)   | 1,468 (7.5)   | 1  | 1,518 (7.7)   | 1,717 (8.7)   | 4 |
| Ciprofloxacin                                                                               | 434 (2.2)     | 561 (2.9)     | 4  | 434 (2.2)     | 494 (2.5)     | 2 |
| Norfloxacin                                                                                 | 51 (0.3)      | 74 (0.4)      | 2  | 51 (0.3)      | 74 (0.4)      | 2 |
| Nitrofurantoin                                                                              | 377 (1.9)     | 566 (2.9)     | 7  | 377 (1.9)     | 501 (2.5)     | 4 |
| Sulfamethoxazole & trimethoprim                                                             | 159 (0.8)     | 220 (1.1)     | 3  | 159 (0.8)     | 203 (1.0)     | 2 |
| Overactive bladder medications                                                              | 329 (1.7)     | 352 (1.8)     | 1  | 329 (1.7)     | 345 (1.7)     | 0 |
| Loop diuretics                                                                              | 1,289 (6.6)   | 1,376 (7.1)   | 2  | 1,289 (6.6)   | 1,352 (6.8)   | 1 |
| Potassium sparing diuretics                                                                 | 610 (3.1)     | 635 (3.3)     | 1  | 610 (3.1)     | 602 (3.0)     | 1 |
| Thiazide diuretics                                                                          | 2,700 (13.8)  | 2,608 (13.4)  | 1  | 2,700 (13.8)  | 2,874 (14.5)  | 2 |
| Any diuretic type                                                                           | 4,240 (21.6)  | 4,231 (21.7)  | 0  | 4,240 (21.6)  | 4,460 (22.6)  | 2 |
| <b>Number of unique diuretic types</b>                                                      |               |               |    |               |               |   |
| 0                                                                                           | 15,371 (78.4) | 15,252 (78.3) | 0  | 15,371 (78.4) | 15,315 (77.4) | 2 |
| 1                                                                                           | 3,892 (19.8)  | 3,858 (19.8)  | 0  | 3,892 (19.8)  | 4,110 (20.8)  | 2 |
| 2                                                                                           | 337 (1.7)     | 358 (1.8)     | 1  | 337 (1.7)     | 332 (1.7)     | 0 |
| 3                                                                                           | 11 (0.1)      | 15 (0.1)      | 0  | 11 (0.1)      | 18 (0.1)      | 0 |
| <b>Number of unique drug names</b>                                                          |               |               |    |               |               |   |
| Mean ± SD                                                                                   | 7.87 ± 4.07   | 6.91 ± 4.43   | 23 | 7.87 ± 4.07   | 8 ± 4.28      | 3 |
| Median (IQR)                                                                                | 7 (5 to 10)   | 7 (4 to 9)    | 24 | 7 (5 to 10)   | 8 (5 to 10)   | 3 |
| 0-4 drug names                                                                              | 3,654 (18.6)  | 5,916 (30.4)  | 28 | 3,654 (18.6)  | 3,837 (19.4)  | 2 |
| 5-9 drug names                                                                              | 10,179 (51.9) | 8,698 (44.6)  | 15 | 10,179 (51.9) | 9,633 (48.7)  | 6 |
| 10-15 drug names                                                                            | 4,924 (25.1)  | 4,113 (21.1)  | 10 | 4,924 (25.1)  | 5,286 (26.7)  | 4 |
| 15-19 drug names                                                                            | 625 (3.2)     | 554 (2.8)     | 2  | 625 (3.2)     | 747 (3.8)     | 3 |
| 20+ drug names                                                                              | 229 (1.2)     | 202 (1.0)     | 2  | 229 (1.2)     | 273 (1.4)     | 2 |
| <b>Hypoglycemic agents dispensed in prior 120 days</b>                                      |               |               |    |               |               |   |
| Insulin                                                                                     | 5,229 (26.7)  | 2,508 (12.9)  | 35 | 5,229 (26.7)  | 5,582 (28.2)  | 3 |
| Acarbose                                                                                    | 366 (1.9)     | 141 (0.7)     | 11 | 366 (1.9)     | 447 (2.3)     | 3 |
| Gliclazide                                                                                  | 6,606 (33.7)  | 4,385 (22.5)  | 25 | 6,606 (33.7)  | 6,870 (34.7)  | 2 |
| Glyburide                                                                                   | 719 (3.7)     | 1,004 (5.2)   | 7  | 719 (3.7)     | 740 (3.7)     | 0 |
| Metformin                                                                                   | 15,765 (80.4) | 12,738 (65.4) | 34 | 15,765 (80.4) | 15,837 (80.1) | 1 |
| Repaglinide                                                                                 | 6 (0.0)       | 10 (0.1)      | 4  | 6 (0.0)       | 23 (0.1)      | 4 |
| Rosiglitazone maleate                                                                       | 13 (0.1)      | 16 (0.1)      | 0  | 13 (0.1)      | 12 (0.1)      | 0 |
| Pioglitazine                                                                                | 100 (0.5)     | 104 (0.5)     | 0  | 100 (0.5)     | 108 (0.5)     | 0 |
| <b>Hypoglycemic agents dispensed on the cohort entry date</b>                               |               |               |    |               |               |   |
| Insulin                                                                                     | 1,153 (5.9)   | 803 (4.1)     | 8  | 1,153 (5.9)   | 1,110 (5.6)   | 1 |
| Acarbose                                                                                    | 122 (0.6)     | 105 (0.5)     | 1  | 122 (0.6)     | 126 (0.6)     | 0 |
| Gliclazide                                                                                  | 2,077 (10.6)  | 2,176 (11.2)  | 2  | 2,077 (10.6)  | 1,946 (9.8)   | 3 |
| Glyburide                                                                                   | 172 (0.9)     | 292 (1.5)     | 6  | 172 (0.9)     | 159 (0.8)     | 1 |
| Metformin                                                                                   | 5,589 (28.5)  | 5,422 (27.8)  | 2  | 5,589 (28.5)  | 5,439 (27.5)  | 2 |
| Pioglitazine                                                                                | 26 (0.1)      | 9 (0.0)       | 4  | 26 (0.1)      | 7 (0.0)       | 4 |
| <b>Hypoglycemic agents dispensed in the 1 year to 120 days before the cohort entry date</b> |               |               |    |               |               |   |

|                                          |               |               |    |               |               |   |
|------------------------------------------|---------------|---------------|----|---------------|---------------|---|
| Insulin                                  | 5,664 (28.9)  | 2,877 (14.8)  | 35 | 5,664 (28.9)  | 5,997 (30.3)  | 3 |
| Acarbose                                 | 445 (2.3)     | 217 (1.1)     | 9  | 445 (2.3)     | 522 (2.6)     | 2 |
| Gliclazide                               | 7,457 (38.0)  | 5,459 (28.0)  | 21 | 7,457 (38.0)  | 7,672 (38.8)  | 2 |
| Glyburide                                | 1,003 (5.1)   | 1,419 (7.3)   | 9  | 1,003 (5.1)   | 1,025 (5.2)   | 0 |
| Metformin                                | 16,698 (85.1) | 14,552 (74.7) | 26 | 16,698 (85.1) | 16,695 (84.4) | 2 |
| Repaglinide                              | 7 (0.0)       | 20 (0.1)      | 4  | 7 (0.0)       | 28 (0.1)      | 4 |
| Rosiglitazone maleate                    | 19 (0.1)      | 22 (0.1)      | 0  | 19 (0.1)      | 15 (0.1)      | 0 |
| Pioglitazone                             | 125 (0.6)     | 141 (0.7)     | 1  | 125 (0.6)     | 148 (0.7)     | 1 |
| <b>Healthcare use in the past 1 year</b> |               |               |    |               |               |   |
| Number of any hospitalizations           |               |               |    |               |               |   |
| Mean ± SD                                | 0.12 ± 0.45   | 0.22 ± 0.65   | 18 | 0.12 ± 0.45   | 0.12 ± 0.44   | 0 |
| Median (IQR)                             | 0 (0 to 0)    | 0 (0 to 0)    | 18 | 0 (0 to 0)    | 0 (0 to 0)    | 1 |
| 0 visits                                 | 17,821 (90.9) | 16,618 (85.3) | 17 | 17,821 (90.9) | 18,001 (91.0) | 0 |
| 1 visit                                  | 1,364 (7.0)   | 1,977 (10.1)  | 11 | 1,364 (7.0)   | 1,378 (7.0)   | 0 |
| 2 visits                                 | 314 (1.6)     | 562 (2.9)     | 9  | 314 (1.6)     | 289 (1.5)     | 1 |
| 3+ visits                                | 112 (0.6)     | 326 (1.7)     | 10 | 112 (0.6)     | 107 (0.5)     | 1 |
| Number of any ED visits                  |               |               |    |               |               |   |
| Mean ± SD                                | 0.5 ± 1.24    | 0.69 ± 1.57   | 13 | 0.5 ± 1.24    | 0.52 ± 1.12   | 2 |
| Median (IQR)                             | 0 (0 to 1)    | 0 (0 to 1)    | 16 | 0 (0 to 1)    | 0 (0 to 1)    | 2 |
| 0 visits                                 | 14,234 (72.6) | 12,840 (65.9) | 15 | 14,234 (72.6) | 14,009 (70.8) | 4 |
| 1 visit                                  | 3,292 (16.8)  | 3,596 (18.5)  | 4  | 3,292 (16.8)  | 3,487 (17.6)  | 2 |
| 2 visits                                 | 1,136 (5.8)   | 1,527 (7.8)   | 8  | 1,136 (5.8)   | 1,256 (6.4)   | 3 |
| 3+ visits                                | 949 (4.8)     | 1,520 (7.8)   | 12 | 949 (4.8)     | 1,023 (5.2)   | 2 |
| GP/FP visits                             |               |               |    |               |               |   |
| Mean ± SD                                | 8.22 ± 6.72   | 9.37 ± 9.93   | 14 | 8.22 ± 6.72   | 8.12 ± 6.79   | 1 |
| Median (IQR)                             | 7 (4 to 10)   | 7 (4 to 11)   | 5  | 7 (4 to 10)   | 7 (4 to 10)   | 1 |
| 0 visits                                 | 460 (2.3)     | 493 (2.5)     | 1  | 460 (2.3)     | 597 (3.0)     | 4 |
| 1-2 visits                               | 1,702 (8.7)   | 1,788 (9.2)   | 2  | 1,702 (8.7)   | 1,707 (8.6)   | 0 |
| 3-4 visits                               | 3,462 (17.7)  | 3,256 (16.7)  | 3  | 3,462 (17.7)  | 3,457 (17.5)  | 1 |
| 5-6 visits                               | 3,824 (19.5)  | 3,629 (18.6)  | 2  | 3,824 (19.5)  | 4,090 (20.7)  | 3 |
| 7-8 visits                               | 3,101 (15.8)  | 2,853 (14.6)  | 3  | 3,101 (15.8)  | 3,076 (15.6)  | 1 |
| 9-10 visits                              | 2,222 (11.3)  | 1,988 (10.2)  | 4  | 2,222 (11.3)  | 2,033 (10.3)  | 3 |
| 11+ visits                               | 4,840 (24.7)  | 5,476 (28.1)  | 8  | 4,840 (24.7)  | 4,814 (24.3)  | 1 |
| Cardiologist visits                      |               |               |    |               |               |   |
| Mean ± SD                                | 1.12 ± 2.36   | 1.25 ± 2.72   | 5  | 1.12 ± 2.36   | 1.12 ± 2.26   | 0 |
| Median (IQR)                             | 0 (0 to 1)    | 0 (0 to 1)    | 2  | 0 (0 to 1)    | 0 (0 to 1)    | 0 |
| 0 visits                                 | 11,273 (57.5) | 11,042 (56.7) | 2  | 11,273 (57.5) | 11,397 (57.6) | 0 |
| 1 visit                                  | 3,882 (19.8)  | 3,875 (19.9)  | 0  | 3,882 (19.8)  | 3,859 (19.5)  | 1 |
| 2 visits                                 | 1,782 (9.1)   | 1,701 (8.7)   | 1  | 1,782 (9.1)   | 1,723 (8.7)   | 1 |
| 3+ visits                                | 2,674 (13.6)  | 2,865 (14.7)  | 3  | 2,674 (13.6)  | 2,795 (14.1)  | 1 |
| Ophthalmologist visits                   |               |               |    |               |               |   |
| Mean ± SD                                | 1.02 ± 2.24   | 0.95 ± 2.14   | 3  | 1.02 ± 2.24   | 1.03 ± 2.27   | 0 |
| Median (IQR)                             | 0 (0 to 1)    | 0 (0 to 1)    | 4  | 0 (0 to 1)    | 0 (0 to 1)    | 1 |
| 0 visits                                 | 12,927 (65.9) | 13,196 (67.7) | 4  | 12,927 (65.9) | 13,015 (65.8) | 0 |
| 1 visit                                  | 2,828 (14.4)  | 2,627 (13.5)  | 3  | 2,828 (14.4)  | 2,814 (14.2)  | 1 |
| 2 visits                                 | 1,386 (7.1)   | 1,354 (6.9)   | 1  | 1,386 (7.1)   | 1,399 (7.1)   | 0 |
| 3+ visits                                | 2,470 (12.6)  | 2,306 (11.8)  | 2  | 2,470 (12.6)  | 2,547 (12.9)  | 1 |
| Endocrinologist visits                   |               |               |    |               |               |   |
| Mean ± SD                                | 0.6 ± 1.31    | 0.34 ± 1.21   | 21 | 0.6 ± 1.31    | 0.59 ± 1.37   | 1 |
| Median (IQR)                             | 0 (0 to 0)    | 0 (0 to 0)    | 29 | 0 (0 to 0)    | 0 (0 to 0)    | 1 |
| 0 visits                                 | 14,809 (75.5) | 16,879 (86.6) | 29 | 14,809 (75.5) | 15,214 (76.9) | 3 |
| 1 visit                                  | 1,422 (7.3)   | 957 (4.9)     | 10 | 1,422 (7.3)   | 1,402 (7.1)   | 1 |
| 2 visits                                 | 1,485 (7.6)   | 764 (3.9)     | 16 | 1,485 (7.6)   | 1,301 (6.6)   | 4 |
| 3+ visits                                | 1,895 (9.7)   | 883 (4.5)     | 20 | 1,895 (9.7)   | 1,858 (9.4)   | 1 |
| Nephrologist visits                      |               |               |    |               |               |   |
| Mean ± SD                                | 0.11 ± 0.67   | 0.14 ± 1.12   | 3  | 0.11 ± 0.67   | 0.11 ± 0.57   | 0 |
| Median (IQR)                             | 0 (0 to 0)    | 0 (0 to 0)    | 5  | 0 (0 to 0)    | 0 (0 to 0)    | 0 |
| 0 visits                                 | 18,607 (94.9) | 18,249 (93.7) | 5  | 18,607 (94.9) | 18,676 (94.4) | 2 |

|                                                     |               |               |    |               |               |    |
|-----------------------------------------------------|---------------|---------------|----|---------------|---------------|----|
| 1 visit                                             | 501 (2.6)     | 624 (3.2)     | 4  | 501 (2.6)     | 498 (2.5)     | 1  |
| 2 visits                                            | 286 (1.5)     | 333 (1.7)     | 2  | 286 (1.5)     | 350 (1.8)     | 2  |
| 3+ visits                                           | 217 (1.1)     | 277 (1.4)     | 3  | 217 (1.1)     | 250 (1.3)     | 2  |
| Diabetes management                                 | 11,451 (58.4) | 10,080 (51.7) | 13 | 11,451 (58.4) | 11,805 (59.7) | 3  |
| Diabetes incentive                                  | 6,855 (35.0)  | 5,782 (29.7)  | 11 | 6,855 (35.0)  | 7,072 (35.8)  | 2  |
| Diabetes management by a specialist                 | 964 (4.9)     | 289 (1.5)     | 19 | 964 (4.9)     | 925 (4.7)     | 1  |
| Diabetes management by a specialist team            | 487 (2.5)     | 112 (0.6)     | 15 | 487 (2.5)     | 447 (2.3)     | 1  |
| Cholesterol tests                                   | 17,740 (90.5) | 16,929 (86.9) | 11 | 17,740 (90.5) | 17,897 (90.5) | 0  |
| Proteinuria                                         | 10,453 (53.3) | 10,905 (56.0) | 5  | 10,453 (53.3) | 10,624 (53.7) | 1  |
| Serum creatine tests                                | 19,026 (97.0) | 18,519 (95.1) | 10 | 19,026 (97.0) | 19,180 (97.0) | 0  |
| Glucose tests                                       | 17,881 (91.2) | 17,288 (88.7) | 8  | 17,881 (91.2) | 17,948 (90.8) | 1  |
| HbA1c tests                                         | 18,996 (96.9) | 18,401 (94.4) | 12 | 18,996 (96.9) | 19,152 (96.8) | 0  |
| DVT/PE                                              | 21 (0.1)      | 48 (0.2)      | 3  | 21 (0.1)      | 22 (0.1)      | 0  |
| Bone mineral density test                           | 1,201 (6.1)   | 1,357 (7.0)   | 4  | 1,201 (6.1)   | 1,211 (6.1)   | 0  |
| Hearing test                                        | 866 (4.4)     | 792 (4.1)     | 1  | 866 (4.4)     | 814 (4.1)     | 1  |
| Sputum                                              | 35 (0.2)      | 52 (0.3)      | 2  | 35 (0.2)      | 54 (0.3)      | 2  |
| Wound swab                                          | 14 (0.1)      | 18 (0.1)      | 0  | 14 (0.1)      | 17 (0.1)      | 0  |
| Holter monitoring                                   | 1,546 (7.9)   | 1,605 (8.2)   | 1  | 1,546 (7.9)   | 1,576 (8.0)   | 0  |
| Cardiac stress test                                 | 3,124 (15.9)  | 2,519 (12.9)  | 9  | 3,124 (15.9)  | 3,064 (15.5)  | 1  |
| Coronary revascularization                          | 382 (1.9)     | 292 (1.5)     | 3  | 382 (1.9)     | 338 (1.7)     | 2  |
| Electrocardiography                                 | 9,239 (47.1)  | 9,809 (50.3)  | 6  | 9,239 (47.1)  | 9,251 (46.8)  | 1  |
| Pulmonary function test                             | 2,244 (11.4)  | 2,051 (10.5)  | 3  | 2,244 (11.4)  | 2,156 (10.9)  | 2  |
| At-home physician service                           | 252 (1.3)     | 481 (2.5)     | 9  | 252 (1.3)     | 237 (1.2)     | 1  |
| Urinalysis                                          | 10,684 (54.5) | 11,202 (57.5) | 6  | 10,684 (54.5) | 10,864 (54.9) | 1  |
| Cystoscopy                                          | 612 (3.1)     | 778 (4.0)     | 5  | 612 (3.1)     | 600 (3.0)     | 1  |
| Transurethral resection of the prostate             | 71 (0.4)      | 81 (0.4)      | 0  | 71 (0.4)      | 53 (0.3)      | 2  |
| Carotid ultrasound                                  | 901 (4.6)     | 994 (5.1)     | 2  | 901 (4.6)     | 942 (4.8)     | 1  |
| Cardiac catheterization                             | 661 (3.4)     | 503 (2.6)     | 5  | 661 (3.4)     | 587 (3.0)     | 2  |
| Coronary angiogram                                  | 648 (3.3)     | 494 (2.5)     | 5  | 648 (3.3)     | 575 (2.9)     | 2  |
| Electroencephalography                              | 51 (0.3)      | 138 (0.7)     | 6  | 51 (0.3)      | 50 (0.3)      | 0  |
| Chest x-ray                                         | 4,899 (25.0)  | 5,929 (30.4)  | 12 | 4,899 (25.0)  | 4,964 (25.1)  | 0  |
| Echocardiography                                    | 4,377 (22.3)  | 4,262 (21.9)  | 1  | 4,377 (22.3)  | 4,387 (22.2)  | 0  |
| Prostate-specific antigen test                      | 1,124 (5.7)   | 845 (4.3)     | 6  | 1,124 (5.7)   | 1,109 (5.6)   | 0  |
| Cervical cancer screening                           | 641 (3.3)     | 531 (2.7)     | 4  | 641 (3.3)     | 614 (3.1)     | 1  |
| <b>Laboratory tests in prior year</b>               |               |               |    |               |               |    |
| eGFR <sup>i</sup> , ml/min/1.73m <sup>2</sup>       |               |               |    |               |               |    |
| Mean ± SD                                           | 76.7 ± 13.9   | 72.9 ± 15.6   | 26 | 76.7 ± 13.9   | 76.7 ± 15.6   | 0  |
| Median (IQR)                                        | 78 (66 to 88) | 74 (59 to 87) | 24 | 78 (66 to 88) | 80 (64 to 90) | 0  |
| 60+                                                 | 16,786 (85.6) | 14,405 (73.9) | 29 | 16,786 (85.6) | 16,009 (81.0) | 12 |
| 45-<60                                              | 2,825 (14.4)  | 5,078 (26.1)  | 29 | 2,825 (14.4)  | 3,766 (19.0)  | 12 |
| Time from most recent SCr test to cohort entry date |               |               |    |               |               |    |
| Mean ± SD                                           | 61.9 ± 75.6   | 63.8 ± 83.6   | 2  | 61.9 ± 75.6   | 59.7 ± 78.5   | 3  |
| Median (IQR)                                        | 28 (9 to 89)  | 24 (8 to 88)  | 6  | 28 (9 to 89)  | 23 (8 to 81)  | 3  |
| Most recent SCr value, µmol/L                       |               |               |    |               |               |    |
| Mean ± SD                                           | 79.7 ± 18.1   | 81.2 ± 20.2   | 8  | 79.7 ± 18.1   | 79.7 ± 20.3   | 0  |
| Median (IQR)                                        | 78 (66 to 91) | 79 (66 to 94) | 6  | 78 (66 to 91) | 77 (65 to 92) | 1  |
| Most recent potassium value, mEq/L                  |               |               |    |               |               |    |
| Potassium data available                            | 5,556 (28.3)  | 7,072 (36.3)  | 17 | 5,556 (28.3)  | 6,110 (30.9)  | 6  |
| Mean ± SD                                           | 4.5 ± 0.5     | 4.4 ± 0.5     | 13 | 4.5 ± 0.5     | 4.5 ± 0.4     | 7  |
| Median (IQR)                                        | 5 (4 to 5)    | 4 (4 to 5)    | 11 | 5 (4 to 5)    | 5 (4 to 5)    | 5  |
| Time from most recent ACR test to cohort entry date |               |               |    |               |               |    |
| Mean ± SD                                           | 67.8 ± 90.5   | 61.4 ± 93.9   | 7  | 67.8 ± 90.5   | 65.2 ± 93.1   | 3  |
| Median (IQR)                                        | 20 (0 to 106) | 10 (0 to 91)  | 19 | 20 (0 to 106) | 16 (0 to 101) | 3  |
| Most recent ACR categories, mg/mmol                 |               |               |    |               |               |    |



|                                              |               |               |    |               |               |   |
|----------------------------------------------|---------------|---------------|----|---------------|---------------|---|
| ACR data available                           | 14,637 (74.6) | 12,381 (63.5) | 24 | 14,637 (74.6) | 14,240 (72.0) | 6 |
| Undetected                                   | 9,424 (48.1)  | 7,903 (40.6)  | 15 | 9,424 (48.1)  | 9,129 (46.2)  | 4 |
| 3-30                                         | 4,263 (21.7)  | 3,729 (19.1)  | 6  | 4,263 (21.7)  | 4,288 (21.7)  | 0 |
| >30                                          | 950 (4.8)     | 749 (3.8)     | 5  | 950 (4.8)     | 823 (4.2)     | 3 |
| Most recent glycosylated hemoglobin level, % |               |               |    |               |               |   |
| Hemoglobin value available                   | 6,516 (33.2)  | 8,071 (41.4)  | 17 | 6,516 (33.2)  | 7,288 (36.9)  | 8 |
| Mean ± SD                                    | 7.8 ± 1.2     | 7.7 ± 1.3     | 12 | 7.8 ± 1.2     | 7.8 ± 1.2     | 2 |
| Median (IQR)                                 | 8 (7 to 8)    | 7 (7 to 8)    | 16 | 8 (7 to 8)    | 8 (7 to 8)    | 3 |
| <6                                           | 89 (1.4)      | 224 (2.8)     | 7  | 89 (1.4)      | 129 (1.8)     | 3 |
| 6-<6.5                                       | 392 (6.0)     | 686 (8.5)     | 9  | 392 (6.0)     | 468 (6.4)     | 3 |
| 6.5-<7.0                                     | 1,018 (15.6)  | 1,500 (18.6)  | 10 | 1,018 (15.6)  | 1,175 (16.1)  | 3 |
| 7.0-<7.5                                     | 1,334 (20.5)  | 1,688 (20.9)  | 7  | 1,334 (20.5)  | 1,483 (20.3)  | 3 |
| 7.5+                                         | 3,683 (56.5)  | 3,973 (49.2)  | 4  | 3,683 (56.5)  | 4,032 (55.3)  | 4 |
| KFRE data, %                                 |               |               |    |               |               |   |
| 2-year KFRE data available                   | 14,637 (74.6) | 12,381 (63.5) | 24 | 14,637 (74.6) | 14,240 (72.0) | 6 |
| <5%                                          | 14,637 (100)  | 12,381 (100)  | 1  | 14,638 (100)  | 14,240 (100)  | 6 |
| 5-year KFRE data available                   | 14,637 (74.6) | 12,381 (63.5) | 24 | 14,637 (74.6) | 14,240 (72.0) | 6 |
| <5%                                          | 14,616 (99.9) | 12,345 (99.7) | 1  | 14,616 (99.9) | 14,200 (99.7) | 6 |
| 5%+                                          | 21 (0.1)      | 36 (0.3)      | 1  | 21 (0.1)      | 40 (0.3)      | 3 |

Abbreviations: ACE= angiotensin-converting-enzyme, ACR= albumin-to-creatinine ratio, ARB= angiotensin-receptor blocker, ASA= acetylsalicylic acid, DPP4= dipeptidyl peptidase-4, DVT/PE= deep vein thrombosis and pulmonary embolism, ED= emergency department, eGFR = estimated glomerular filtration, GP/FP= general practice/family practice, HbA1c= hemoglobin A1c, IQR= interquartile range, KFRE= kidney failure risk equation, NSAID= nonsteroidal anti-inflammatory drug, SCr= serum creatinine, Stan. Diff.= standardized difference, SD= standard deviation, SGLT2= sodium-glucose cotransporter-2

<sup>a</sup>Unless otherwise specified, baseline characteristics were assessed on the date the patient filled their prescription: the cohort entry date.

<sup>b</sup>Weighted using inverse probability of treatment weighting based on propensity scores, using weights to estimate the average treatment effect in the treated. Patients in the reference group were weighted as [propensity score/(1 - propensity score)]. This method produces a weighted pseudo-sample of patients in the reference group with the same distribution of measured covariates as the exposure group. (17–19)

<sup>c</sup>The difference between the groups divided by the pooled SD; a value greater than 10% is interpreted as a meaningful difference. (20)

<sup>d</sup>Rural residence was defined as a population < 10,000 people. Residential information was not available for 33 (0.2%) SGLT2 inhibitor users and 18 (0.1%) DPP4 inhibitor users in the unweighted cohort. Missing values in the unweighted cohort were re-classified into the “Not rural” category during weighting.

<sup>e</sup>Income was categorized into fifths of average neighborhood income on the cohort entry date.

<sup>f</sup>Charlson comorbidity score (21,22) was calculated using five years of hospitalization data. “No hospitalizations” received a score of 0.

<sup>g</sup>Medication use was examined in the 120-day period before the cohort entry date (the Ontario Drug Benefit program dispenses a maximum 100-day supply).

<sup>h</sup>Only included dispensed acetylsalicylic acid use and does not account for over-the-counter acetylsalicylic acid use.

<sup>i</sup>Excludes acetylsalicylic acid.

<sup>j</sup>The most recent eGFR measurement in the 1-to-365-day period before the index date; eGFR was calculated using the Chronic Kidney Disease (CKD)–Epidemiology (EPI) equation:  $141 \times \min\{\text{serum creatinine concentration in } \mu\text{mol/L}/88.4/k, 1\} \alpha \times \max\{\text{serum creatinine concentration in } \mu\text{mol/L}/88.4/k, 1\} - 1.209 \times 0.993 \text{Age} \times 1.018$  [if female]  $\times 1.159$  [if African-American];  $k=0.7$  if female and  $0.9$  if male;  $\alpha=-0.329$  if female and  $-0.411$  if male;  $\min$ =the minimum of serum creatinine concentration/ $k$  or  $1$ ;  $\max$ =the maximum of serum creatinine concentration/ $k$  or  $1$ . Information on race was not available in our data sources and all patients were assumed not to be of African-Canadian race; African-Canadians represented less than 5% of the population of Ontario in 2006.

**Appendix 1K. The proportion of patients who had at least one serum creatinine measurement during the follow-up period**

|                                                        | Observed                       |                               | Weighted <sup>b</sup>          |                               |                                |         |                           |         |
|--------------------------------------------------------|--------------------------------|-------------------------------|--------------------------------|-------------------------------|--------------------------------|---------|---------------------------|---------|
|                                                        | No. events (%)                 |                               | No. events (%)                 |                               | Risk difference, %<br>(95% CI) | P value | Relative risk<br>(95% CI) | P value |
|                                                        | SGLT2 inhibitors<br>(n=19,611) | DPP4 inhibitors<br>(n=19,483) | SGLT2 inhibitors<br>(n=19,611) | DPP4 inhibitors<br>(n=19,775) |                                |         |                           |         |
| At least one serum creatinine measurement <sup>c</sup> | 10,619<br>(54.15)              | 9,602<br>(49.28)              | 10,619<br>(54.15)              | 9,718<br>(49.14)              | 5.00<br>(3.65 to 6.36)         | < 0.01  | 1.10<br>(1.07 to 1.13)    | < 0.01  |

Abbreviations: CI= confidence interval, DPP4= dipeptidyl peptidase-4, SGLT2= sodium-glucose cotransporter-2.

<sup>a</sup>Reference group: DPP4 inhibitor users.

<sup>b</sup>Weighted using inverse probability of treatment weighting based on propensity scores, using weights to estimate the average treatment effect in the treated. Patients in the reference group were weighted as [propensity score/(1 - propensity score)]. This method produces a weighted pseudo-sample of patients in the reference group with the same distribution of measured covariates as the exposure group (17–19). Weighted relative risks and 95% CIs were obtained using modified Poisson regression (23) and weighted risk differences and 95% CIs were obtained using a binomial regression model with an identity link function.

<sup>c</sup>Based on tests done in an outpatient setting assessed using the Ontario Laboratories Information System serum creatinine values

**Appendix 1L. Absolute changes ( $\mu\text{mol/L}$ ) in serum creatinine after SGLT2 inhibitor and DPP4 inhibitor use**

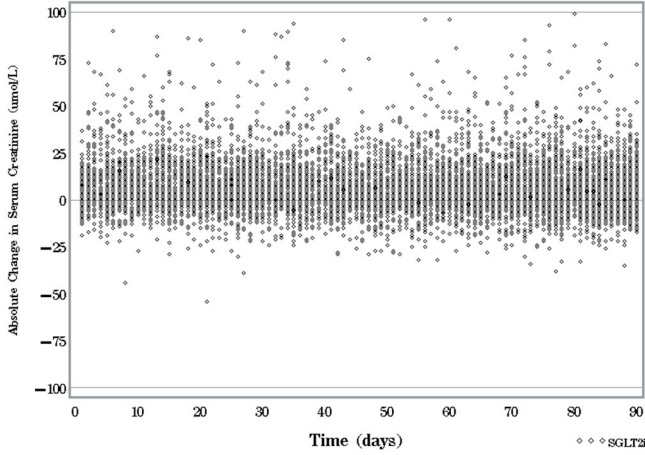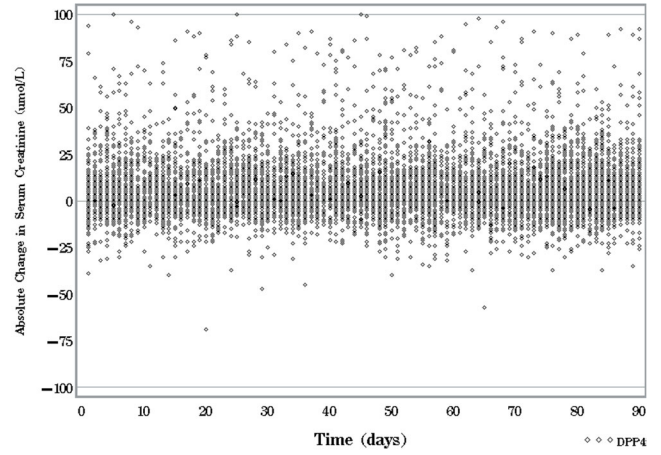

| <b>SGLT2i users</b> |                               |               |                     |
|---------------------|-------------------------------|---------------|---------------------|
|                     | <b>Unit change (weighted)</b> |               |                     |
| <b>N</b>            | <b>Mean (SD)</b>              | <b>95% CI</b> | <b>Median (IQR)</b> |
| 10,936              | 8 (26)                        | 7-8           | 5 (-1,12)           |

| <b>DPP4i users</b> |                               |               |                     |
|--------------------|-------------------------------|---------------|---------------------|
|                    | <b>Unit change (weighted)</b> |               |                     |
| <b>N</b>           | <b>Mean (SD)</b>              | <b>95% CI</b> | <b>Median (IQR)</b> |
| 10,070             | 7 (26)                        | 6-7           | 4 (-2,11)           |

| <b>Weighted mean difference<sup>a</sup></b> |                           | <b>p-value</b> |
|---------------------------------------------|---------------------------|----------------|
| <b>Estimate</b>                             | <b>95% CI<sup>a</sup></b> |                |
| 1.01                                        | 0.30-1.71                 | 0.005          |

<sup>a</sup>Weighted mean difference and 95% CIs were obtained using a normal regression model with an identity link function.

**Appendix 1M. Percent changes in serum creatinine after SGLT2 inhibitor and DPP4 inhibitor use**

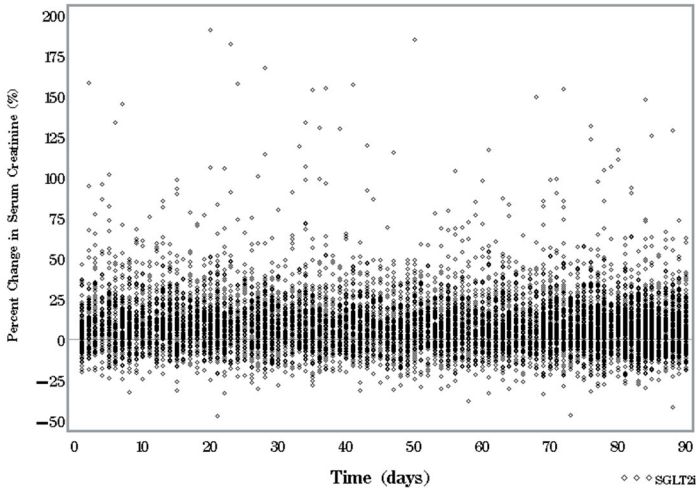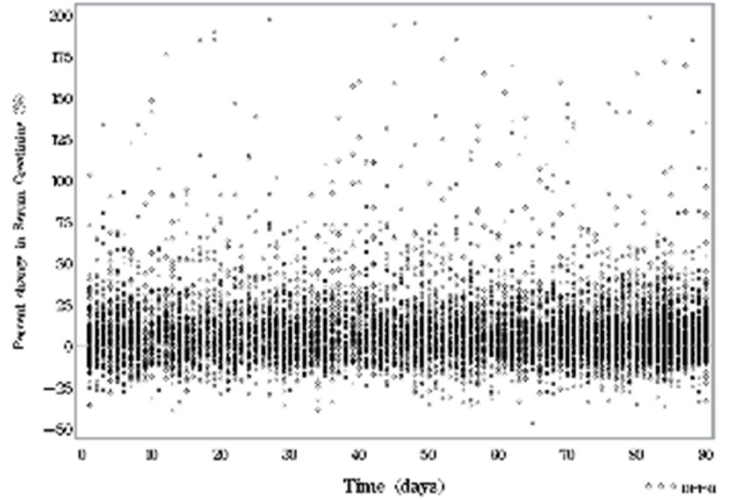

| SGLT2i users |                        |        |              |
|--------------|------------------------|--------|--------------|
|              | Unit change (weighted) |        |              |
| N            | Mean (SD)              | 95% CI | Median (IQR) |
| 10,936       | 10 (32)                | 9-11   | 7 (-1,16)    |

| DPP4i users |                        |        |              |
|-------------|------------------------|--------|--------------|
|             | Unit change (weighted) |        |              |
| N           | Mean (SD)              | 95% CI | Median (IQR) |
| 10,070      | 9 (29)                 | 8-9    | 5 (-3,14)    |

| Weighted mean difference <sup>a</sup> |                     | p-value |
|---------------------------------------|---------------------|---------|
| Estimate                              | 95% CI <sup>a</sup> |         |
| 1.27                                  | 0.45-2.10           | 0.002   |

<sup>a</sup>Weighted mean difference and 95% CIs were obtained using a normal regression model with an identity link function.

**Appendix 1N. 90-day risk of hospital encounter with acute kidney injury using diagnostic codes**

|                                  | Observed                          |                                  | Weighted <sup>b</sup>             |                                  |                                |                |                        |            |
|----------------------------------|-----------------------------------|----------------------------------|-----------------------------------|----------------------------------|--------------------------------|----------------|------------------------|------------|
|                                  | No. events (%)                    |                                  | No. events (%)                    |                                  | Risk difference, %<br>(95% CI) | P<br>valu<br>e | Risk ratio<br>(95% CI) | P<br>value |
|                                  | SGLT2<br>inhibitors<br>(n=19,611) | DPP4<br>inhibitors<br>(n=19,483) | SGLT2<br>inhibitors<br>(n=19,611) | DPP4<br>inhibitors<br>(n=19,775) |                                |                |                        |            |
| <b>Outcome</b>                   |                                   |                                  |                                   |                                  |                                |                |                        |            |
| Acute kidney injury <sup>c</sup> | 65 (0.33)                         | 155 (0.80)                       | 65 (0.33)                         | 83 (0.42)                        | -0.09 (-0.23 to 0.05)          | 0.23           | 0.79 (0.55 to 1.14)    | 0.22       |

Abbreviations: CI= confidence interval, DPP4= dipeptidyl peptidase-4, SGLT2= sodium-glucose cotransporter-2.

<sup>a</sup>Reference group: DPP4 inhibitor users.

<sup>b</sup>Weighted using inverse probability of treatment weighting based on propensity scores, using weights to estimate the average treatment effect in the treated. Patients in the reference group were weighted as [propensity score/(1 - propensity score)]. This method produces a weighted pseudo-sample of patients in the reference group with the same distribution of measured covariates as the exposure group (17–19). Weighted risk ratios and 95% CIs were obtained using modified Poisson regression (23) and weighted risk differences and 95% CIs were obtained using a binomial regression model with an identity link function.

<sup>c</sup>Based on hospital presentation (emergency department or hospitalization) assessed using diagnostic codes.

**Appendix 10. Risk of hospital encounter with acute kidney injury<sup>a</sup> within 365 days among SGLT2 inhibitor users compared with DPP4 inhibitor users**

|                              | Observed     |                |                                  | Weighted <sup>c</sup> |                |                                  |                                  |         |
|------------------------------|--------------|----------------|----------------------------------|-----------------------|----------------|----------------------------------|----------------------------------|---------|
|                              | No. patients | No. events (%) | Event rate per 1000 person-years | No. patients          | No. events (%) | Event rate per 1000 person-years | Hazard ratio (95% CI)            | P value |
| SGLT2 inhibitors             | 19,611       | 2,666 (13.59)  | 172.42                           | 19,611                | 2,666 (13.59)  | 172.42                           | 0.83 (0.78 to 0.89) <sup>d</sup> | <.0001  |
| DPP4 inhibitors <sup>b</sup> | 19,483       | 3,712 (19.05)  | 245.77                           | 19,775                | 3,164 (16.00)  | 207.51                           |                                  |         |

Abbreviations: CI= confidence interval, DPP4= dipeptidyl peptidase-4, SGLT2= sodium-glucose cotransporter-2.

<sup>a</sup>365- day risk of acute kidney injury, based on hospital presentation (emergency department or hospitalization) assessed using the Ontario Laboratories Information System serum creatinine values.

<sup>b</sup>Reference group: DPP4 inhibitor users.

<sup>c</sup>Weighted using inverse probability of treatment weighting based on propensity scores, using weights to estimate the average treatment effect in the treated. Patients in the reference group were weighted as [propensity score/(1 - propensity score)]. This method produces a weighted pseudo-sample of patients in the reference group with the same distribution of measured covariates as the exposure group (17–19).

<sup>d</sup>Weighted hazard ratio and 95% CI were obtained using Cox regression (with 365-day follow-up censoring on death). A similar result was observed when death was treated as a competing risk, with a HR 0.83 (95% CI 0.79 to 0.88). 95% CI was obtained using a bootstrap estimator (24). In addition, the proportional hazards assumption was tested by including time dependent covariates in the model and the assumption was not violated.

### Appendix 1P. 90-day risk of hospital encounter with bowel obstruction

|                                | Observed                    |                            | Weighted <sup>b</sup>       |                            | Risk difference, <sup>a</sup> % (95% CI) | P value | Risk ratio <sup>a</sup> (95% CI) | P value |
|--------------------------------|-----------------------------|----------------------------|-----------------------------|----------------------------|------------------------------------------|---------|----------------------------------|---------|
|                                | No. events (%)              |                            | No. events (%)              |                            |                                          |         |                                  |         |
|                                | SGLT2 inhibitors (n=19,611) | DPP4 inhibitors (n=19,483) | SGLT2 inhibitors (n=19,611) | DPP4 inhibitors (n=19,775) |                                          |         |                                  |         |
| <b>Outcome</b>                 |                             |                            |                             |                            |                                          |         |                                  |         |
| Bowel obstruction <sup>c</sup> | 20 (0.10)                   | 36 (0.18)                  | 20 (0.10)                   | 20 (0.10)                  | 0 (-0.07 to 0.07)                        | 1.00    | 1.00 (0.49 to 2.06)              | 1.00    |

Abbreviations: CI= confidence interval, DPP4= dipeptidyl peptidase-4, SGLT2= sodium-glucose cotransporter-2.

<sup>a</sup>Reference group: DPP4 inhibitor users.

<sup>b</sup>Weighted using inverse probability of treatment weighting based on propensity scores, using weights to estimate the average treatment effect in the treated. Patients in the reference group were weighted as [propensity score/(1 - propensity score)]. This method produces a weighted pseudo-sample of patients in the reference group with the same distribution of measured covariates as the exposure group (17–19). Weighted risk ratios and 95% CIs were obtained using modified Poisson regression (23) and weighted risk differences and 95% CIs were obtained using a binomial regression model with an identity link function.

<sup>c</sup>Based on hospital presentation (emergency department or hospitalization) assessed using diagnostic codes.

**Appendix 1Q. Post-hoc E-value analysis to assess the extent of unmeasured confounding that would be required to negate the observed results**

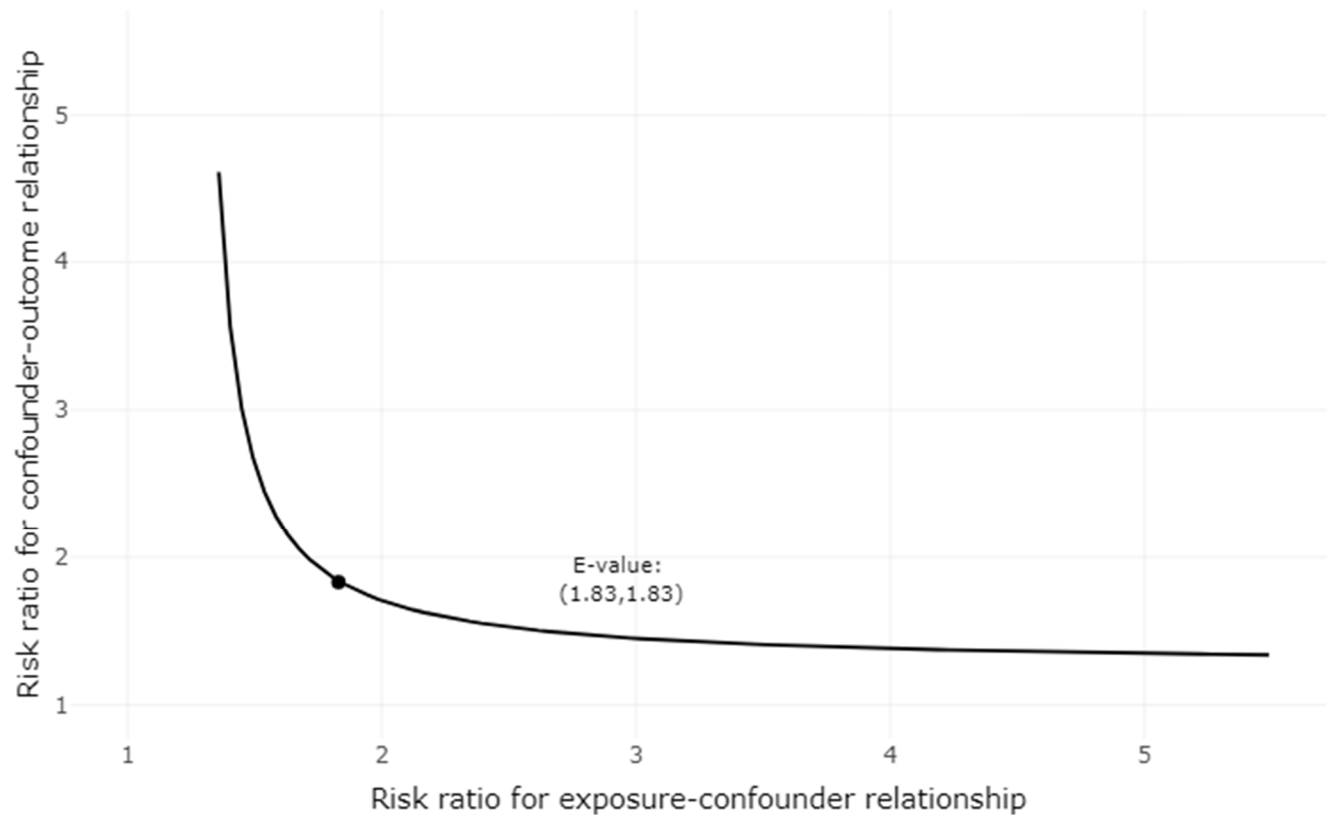

E-value for point estimate: 1.83 and for confidence interval: 1.14

Each point along the curve defines a joint relationship between the two sensitivity parameters that could potentially explain away the estimated effect. If one of the two parameters is smaller than the E-value, the other must be larger, as defined by the plotted curve



**Appendix 1R. Observed distribution of propensity scores in SGLT2 inhibitor users and DPP4 inhibitor users**

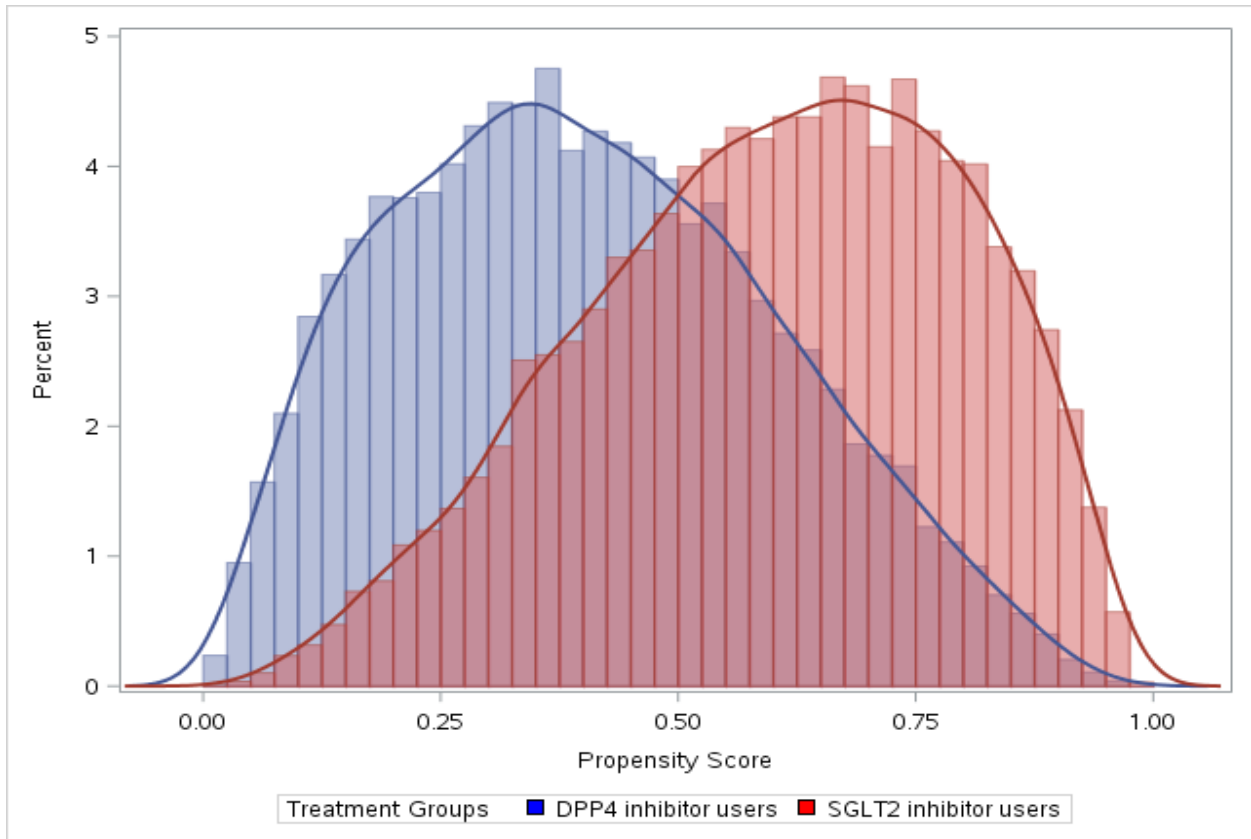

**Appendix 1S. Weighted distribution<sup>a</sup> of propensity scores in SGLT2 inhibitor users and DPP4 inhibitor users**

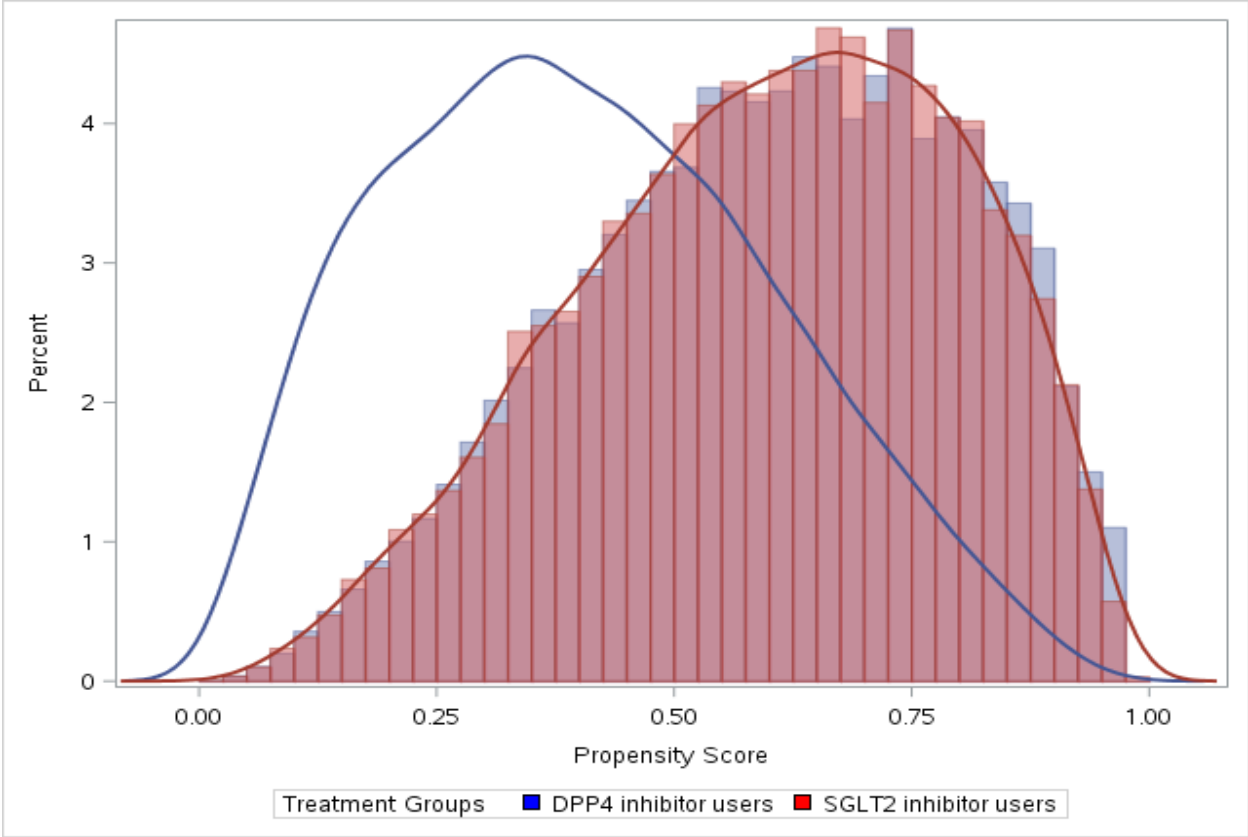

<sup>a</sup>Please refer to Table 1 in the manuscript to see that weighting achieved balance on the measured covariates.

## References

1. U.S. Food & Drug Administration. FDA Drug Safety Communication: FDA strengthens kidney warnings for diabetes medicines canagliflozin (Invokana, Invokamet) and dapagliflozin (Farxiga, Xigduo XR) [Internet]. [cited 2019 Apr 3]. Available from: <https://www.fda.gov/drugs/drug-safety-and-availability/fda-drug-safety-communication-fda-strengthens-kidney-warnings-diabetes-medicines-canagliflozin>
2. Government of Canada. Summary Safety Review - Sodium Glucose Cotransporter 2 (SGLT2) Inhibitors INVOKANA (canagliflozin) and FORXIGA (dapagliflozin) - Evaluation of a Potential Risk of Acute Kidney Injury [Internet]. [cited 2019 Apr 3]. Available from: <https://www.canada.ca/en/health-canada/services/drugs-health-products/medeffect-canada/safety-reviews/summary-safety-review-sodium-glucose-cotransporter-2-sglt2-inhibitors-invokana-canagliflozin-forxiga-dapagliflozin-risk.html>
3. US Food and Drug Administration. FDA briefing document: Endocrine and Metabolic Drug Advisory Committee Meeting, June 28, 2016 [Internet]. [cited 2019 Sep 24]. Available from: <https://www.fda.gov/media/98910/download>
4. Zinman B, Wanner C, Lachin JM, Fitchett D, Bluhmki E, Hantel S, et al. Empagliflozin, Cardiovascular Outcomes, and Mortality in Type 2 Diabetes. *N Engl J Med* [Internet]. 2015;373(22):2117–28. Available from: <http://ovidsp.ovid.com/ovidweb.cgi?T=JS&PAGE=reference&D=medc&NEWS=N&AN=26378978>
5. Wanner C, Inzucchi SE, Lachin JM, Fitchett D, von Eynatten M, Mattheus M, et al. Empagliflozin and Progression of Kidney Disease in Type 2 Diabetes. *N Engl J Med* [Internet]. 2016;375(4):323–34. Available from: <http://ovidsp.ovid.com/ovidweb.cgi?T=JS&PAGE=reference&D=medc&NEWS=N&AN=27299675>
6. Neal B, Perkovic V, Mahaffey KW, de Zeeuw D, Fulcher G, Erondou N, et al. Canagliflozin and Cardiovascular and Renal Events in Type 2 Diabetes. *N Engl J Med*. 2017 Aug;377(7):644–57.
7. Wiviott SD, Raz I, Bonaca MP, Mosenzon O, Kato ET, Cahn A, et al. Dapagliflozin and Cardiovascular Outcomes in Type 2 Diabetes. *N Engl J Med*. 2019 Jan;380(4):347–57.
8. Perkovic V, Jardine MJ, Neal B, Bompoint S, Heerspink HJL, Charytan DM, et al. Canagliflozin and Renal Outcomes in Type 2 Diabetes and Nephropathy. *N Engl J Med*. 2019 Apr;380(24):2295–306.
9. Nadkarni GN, Ferrandino R, Chang A, Surapaneni A, Chauhan K, Poojary P, et al. Acute Kidney Injury in Patients on SGLT2 Inhibitors: A Propensity-Matched Analysis. *Diabetes Care* [Internet]. 2017;40(11):1479–85. Available from: <http://ovidsp.ovid.com/ovidweb.cgi?T=JS&PAGE=reference&D=medc&NEWS=N&AN=28827404>
10. Cahn A, Melzer-Cohen C, Pollack R, Chodick G, Shalev V. Acute renal outcomes with sodium-glucose co-transporter-2 inhibitors: Real-world data analysis. *Diabetes, Obes Metab*. 2019;21(2):340–8.
11. Ueda P, Svanstrom H, Melbye M, Eliasson B, Svensson A-M, Franzen S, et al. Sodium glucose cotransporter 2 inhibitors and risk of serious adverse events: nationwide register based cohort study. *BMJ* [Internet]. 2018;363:k4365. Available from: <http://ovidsp.ovid.com/ovidweb.cgi?T=JS&PAGE=reference&D=prem&NEWS=N&AN=30429124>
12. Langan SM, Schmidt SA, Wing K, Ehrenstein V, Nicholls SG, Filion KB, et al. The reporting of studies conducted using observational routinely collected health data statement for pharmacoepidemiology (RECORD-PE). *BMJ*. 2018 Nov;363:k3532.
13. Levy AR, O'Brien BJ, Sellors C, Grootendorst P, Willison D. Coding accuracy of administrative drug claims in the Ontario Drug Benefit database. *Can J Clin Pharmacol*. 2003;10(2):67–71.
14. Levey AS, Stevens LA. Estimating GFR using the CKD Epidemiology Collaboration (CKD-EPI) creatinine equation: more accurate GFR estimates, lower CKD prevalence estimates, and better risk predictions. Vol. 55, *American journal of kidney diseases : the official journal of the National*

- Kidney Foundation. United States; 2010. p. 622–7.
15. Government of Canada. Drug Product Database online query [Internet]. [cited 2019 Jun 5]. Available from: <https://health-products.canada.ca>
  16. Kellum JA, Lameire N, Aspelin P, Barsoum RS, Burdmann EA, Goldstein SL, et al. Kidney disease: improving global outcomes (KDIGO) acute kidney injury work group. KDIGO clinical practice guideline for acute kidney injury. *Kidney Int Suppl.* 2012;2(1):1–138.
  17. Sato T, Matsuyama Y. Marginal structural models as a tool for standardization. *Epidemiology.* 2003 Nov;14(6):680–6.
  18. Brookhart MA, Wyss R, Layton JB, Sturmer T. Propensity score methods for confounding control in nonexperimental research. *Circ Cardiovasc Qual Outcomes.* 2013 Sep;6(5):604–11.
  19. Austin PC. An Introduction to Propensity Score Methods for Reducing the Effects of Confounding in Observational Studies. *Multivariate Behav Res.* 2011 May;46(3):399–424.
  20. Austin PC. Using the standardized difference to compare the prevalence of a binary variable between two groups in observational research. *Commun Stat Comput.* 2009;38(6):1228–34.
  21. Charlson ME, Pompei P, Ales KL, MacKenzie CR. A new method of classifying prognostic comorbidity in longitudinal studies: development and validation. *J Chronic Dis.* 1987;40(5):373–83.
  22. Quan H, Sundararajan V, Halfon P, Fong A, Burnand B, Luthi JC, et al. Coding algorithms for defining comorbidities in ICD-9-CM and ICD-10 administrative data. *Med Care.* 2005 Nov;43(11):1130–9.
  23. Zou G. A modified poisson regression approach to prospective studies with binary data. *Am J Epidemiol.* 2004 Apr;159(7):702–6.
  24. Austin PC. Variance estimation when using inverse probability of treatment weighting (IPTW) with survival analysis. *Stat Med.* 2016 Dec;35(30):5642–55.
